# Supplementary material
Source: MDPI journal article supplement (https://www.mdpi.com/1424-8247/16/4/623)

## **Supplementary Online Content**

### **Table of contents**

#### **Supplementary Methods: Inclusion Criteria, Exclusion Criteria**

**Table S1. Changes in serum biomarkers from baseline to week 24 in the PPS**

**Table S2. Changes in serum biomarkers from baseline to week 8 and week 16 in the FAS**

**Table S3. Changes in serum biomarkers from baseline to week 8 and week 16 in the PPS**

**Table S4. Significantly changed miRNAs from ALS-L1023 treated patients**

**Table S5. 6 miRNAs and their putative target transcripts**

**Table S6. KEGG analysis using 499 putative target transcripts**

**Figure S1. Summary of study design**

**Figure S2. MRI-PDFF change in the PPS.** MRI-PDFF results relative mean fat reduction percent from baseline (A), and absolute amount of fat reduction (B) as determined by MRI-PDFF at week 24

**Figure S3. Change of liver biochemistry in the PPS.** Time course of liver enzymes ALT (A), and AST (B). Time course of total cholesterol level (C).

## Supplementary Methods

### Inclusion Criteria

- 1) Subject is a male or female between 19 to 75 years of age inclusive
- 2) Subjects diagnosed with NAFLD (Nonalcoholic fatty liver disease) with findings of liver fat deposition by imaging tests such as abdominal ultrasonography and MRI
- 3) Subjects with liver fat content  $\geq 8\%$  as measured by MRI-PDFF within 90 days before screening and with liver fibrosis  $\geq 2.5$  kPa as measured by MRE
- 4) Patients who voluntarily decide to participate and agree in writing to abide by the precautions after hearing and fully understanding the detailed explanation of this clinical trial

### Exclusion Criteria

- 1) Subjects who consumed significant alcohol for more than 3 consecutive months within 2 years before screening (significant alcohol intake:  $>210$  g/week for men,  $>140$  g/week for women)
- 2) Subjects with a history or presence of the following liver diseases
  - Current history of acute and chronic viral hepatitis (including HBsAg and HCV Ab positive in screening for hepatitis B and C)
  - Decompensated liver cirrhosis or liver cancer
  - Autoimmune liver disease (e.g., autoimmune hepatitis, primary biliary cirrhosis, primary sclerosing cholangitis, immunoglobulin G4-related cholangitis, etc.)
  - Alcoholic liver disease or drug-induced liver disease
  - Hereditary liver disease (e.g. Wilson's disease, alpha-1 antitrypsin deficiency, hemochromatosis, etc.)
- 3) Subjects with a history of uncontrolled hypertension ( $\geq 180/110$  mmHg), severe heart disease (e.g. heart failure, unstable angina, myocardial infarction, arrhythmia requiring treatment, etc.), or severe cerebrovascular disease (e.g. cerebral infarction, cerebral hemorrhage, etc.). However, a subject could participate if an investigator judged that a subject could participate in this clinical trial because the subject was clinically stable.
- 4) Subjects with a history of malignant tumors. However, participation is possible if there is no recurrence for more than 5 years after being cured.
- 5) Subjects who have undergone a surgical operation (e.g. bariatric surgery) for weight loss within 5 years before screening
- 6) Patients with type 1 diabetes or uncontrolled diabetes mellitus (HbA1C  $>9.0\%$  at screening)
- 7) Subjects with a clinically significant history of kidney disease (Serum creatinine  $>$ Upper limits of normal (ULN) at screening)
- 8) Uncontrolled Hypothyroidism (TSH  $\geq 2X$  Upper limits of normal (ULN) at screening) or uncontrolled thyroid dysfunction (if not controlled for more than 6 months before screening)

according to the investigator's judgment)

- 9) If ALT or AST is more than 5 times the upper limit of normal at the before-screening test
- 10) Subjects who have continuously administered the following drugs for more than 2 weeks within 8 weeks before screening
  - Systemic Glucocorticoids (inhalation, topical steroids (e.g. nasal spray, eye drops, intra-articular administration, etc.) administration are allowed)
  - Ibuprofen, Naproxen
- 11) Subjects who have administered the following drugs within 8 weeks before screening
  - Polyunsaturated fatty acids (>2 g/day)
  - Immunomodulators (e.g. Azathioprine, 6-mercaptopurine, Methotrexate, Cyclosporin, Anti-TNF- $\alpha$ , Anti-integrin)
  - Irinotecan, Tamoxifen, 5-fluorouracil, Cisplatin, Asparaginase
  - Valproic acid
  - Amiodarone
  - Antiobesity drugs (e.g. Orlistat, Phentermine, Diethylpropion, Mazindol, Lorcaserin, Liraglutide, etc.)
- 12) Subjects who need to be administered the following drugs that are judged to affect the efficacy evaluation results during clinical trials. However, if the following conditions are satisfied, randomization is possible
  - UDCA ( $\geq 150$  mg/day): Randomization possible after a washout period of 2 weeks or more
  - SAMe, Betaine, Milk thistle, Pentoxifylline: randomization possible after a 1-week washout period
  - Antihyperlipidemic drugs (e.g. Statins, Fibrates, Ezetimibe, etc.), Angiotensin Receptor Blocker (e.g. Losartan, etc.): randomization is possible if administered without changing usage or dosage for more than 12 weeks before screening
  - Diabetes drugs other than thiazolidinediones (e.g. Metformin, Sulfonylureas, Insulin, etc.), Thyroid Hormone formulations (e.g. Levothyroxine sodium, etc.): randomization is possible if administered at a stable dose for more than 12 weeks before screening
  - Vitamin E (>400 IU/day), Thiazolidinediones (Pioglitazone, Rosiglitazone): randomization is possible if administered without changing usage or dosage for more than 6 months before screening
  - Drugs that may affect the efficacy evaluation results according to the judgment of other investigators
- 13) Subjects with hypersensitivity to an investigational drug or components of an investigational drug such as Melissa, microcrystalline cellulose, hydroxypropyl cellulose, etc.
- 14) Subjects who cannot tolerate the noise in the examination equipment or isolation environment in the MRI room, or who are contraindicated in MRI examination (e.g. cardiac pacemakers, metallic vascular clips, those who wear iron implants or devices in the body, those who insert prostheses into the eyes or ears, and others who have foreign substances in their body that can be affected by magnetic fields)
- 15) Women of childbearing potential who do not consent to contraception by a medically accepted method of contraception during the clinical trial period (hormonal therapy, IUD (intrauterine device) or IUS (Intrauterine system), tubal ligation, double blocking method (combined use of blocking methods such

as male condoms, female condoms, cervical caps, contraceptive diaphragms, and contraceptive sponges, etc.)

- 16) Pregnant or lactating women
- 17) Subjects who received other clinical investigational drugs within 30 days before screening
- 18) If the investigator judges that the subject is unsuitable for this clinical trial by other reasons

**Table S1. Changes in serum biomarkers from baseline to week 24 in the PPS**

|                        | ALS-L1023 1800mg    |                     |                | ALS-L1023 1200mg     |                     |                | Placebo              |                      |                | p <sup>2</sup> | p <sup>3</sup> |
|------------------------|---------------------|---------------------|----------------|----------------------|---------------------|----------------|----------------------|----------------------|----------------|----------------|----------------|
| Value                  | CFB                 | % CFB               | p <sup>1</sup> | CFB                  | % CFB               | p <sup>1</sup> | CFB                  | % CFB                | p <sup>1</sup> |                |                |
| ALT, U/L               | -12 (-19, 3)        | -13.5 (-30.2, 6.7)  | 0.07           | -17 (-40, 0)         | -36.0 (-47.8, 0)    | 0.10           | 1 (-7, 22)           | 0.7 (-15.4, 44.0)    | 0.45           | 0.04           | 0.03           |
| AST, IU/L              | -1 (-12, 9)         | -1.5 (-21.7, 15.9)  | 0.47           | -11 (-29, 4)         | -21.0 (-41.7, 10.5) | 0.15           | 0 (-6, 22)           | 0 (-16.1, 55.2)      | 0.57           | 0.37           | 0.15           |
| GGT, IU/L              | -3 (-12, 8)         | -8.1 (-17.4, 17.2)  | 0.37           | -3 (-37, 7)          | -7.69 (-44.3, 11.9) | 0.09           | 1 (-3, 6)            | 2.2 (-8.1, 23.1)     | 0.20           | 0.29           | 0.14           |
| ALP, IU/L              | 1 (-8, 5)           | 0.6 (-8.9, 6.9)     | 0.76           | -1 (-11, 5)          | -1.06 (-14.0, 6.3)  | 0.45           | -3 (-21, 7)          | -3.6 (-18.8, 14.1)   | 0.13           | 0.29           | 0.35           |
| Total bilirubin, mg/dL | -0.1 (-0.1, 0.3)    | -8.0 (-19.0, 26.0)  | 0.81           | 0.1 (-0.1, 0.3)      | 15.25 (-13.6, 33.6) | 0.07           | 0.2 (-0.3, 0.4)      | 17.2 (-21.4, 60.9)   | 0.32           | 0.33           | 0.77           |
| Triglycerides, mg/dL   | -32 (-52, 6)        | -12.5 (-27.7, 29.9) | 0.23           | -7 (-44, 15)         | -4.4 (-28.4, 11.4)  | 0.35           | -34 (-70, -5)        | -18.0 (-36.4, -2.7)  | <0.01          | 0.40           | 0.14           |
| TC, mg/dL              | 4 (-15, 12)         | 1.6 (-8.9, 7.6)     | 0.83           | -10 (-19, -4)        | -5.8 (-12.9, -1.5)  | <0.01          | 10 (-12, 16)         | 5.4 (-6.3, 7.6)      | 0.33           | 0.40           | <0.01          |
| HDL-C, mg/dL           | 1 (-5, 4)           | 1.1 (-9.4, 8.6)     | 0.90           | -1 (-7, 5)           | -2.7 (-12.6, 11.5)  | 0.70           | 1 (-2, 7)            | 2.0 (-3.3, 14.9)     | 0.31           | 0.39           | 0.36           |
| LDL-C, mg/dL           | -3 (-13, 9)         | -2.1 (-8.2, 9.5)    | 0.47           | -7 (-23, 6)          | -9.21 (-21.5, 5.7)  | 0.08           | 6 (0, 19)            | 6.1 (0, 12.2)        | 0.10           | 0.09           | 0.02           |
| Pro-C3                 | -0 (-0.6, 1.3)      | -1.0 (-6.2, 14.5)   | 0.77           | -0.3 (-1.0, 1.2)     | -3.7 (-12.6, 18.6)  | 0.78           | -0.2 (-0.7, 1.1)     | -2.0 (-10.9, 17.6)   | 0.96           | 0.81           | 0.83           |
| CK-18                  | 29.7 (-83.7, 100.2) | 13.7 (-34.0, 47.0)  | 0.67           | -61.7 (-192.4, 40.4) | -18.3 (-56.2, 30.7) | 0.21           | -3.7 (-128.6, 206.7) | -10.5 (-23.2, 101.1) | 0.94           | 0.90           | 0.39           |
| HOMA-IR                | 0.12 (-1.5, 1.9)    | 4.1 (-25.5, 41.9)   | 0.98           | -0.16 (-4.0, 1.0)    | -6.03 (-57.2, 45.2) | 0.16           | 0.15 (-1.6, 1.3)     | 4.99 (-32.7, 36.1)   | 0.96           | 0.93           | 0.58           |
| Leptin                 | -0.7 (-5.8, 3.4)    | -1.3 (-23.8, 15.9)  | 0.77           | 0.2 (-5.8, 4.0)      | 2.5 (-14.6, 26.6)   | 0.85           | -0.8 (-3.2, 1.4)     | -5.0 (-16.8, 10.2)   | 0.22           | 0.81           | 0.73           |
| Ghrelin                | 15.7 (0.0, 30.6)    | 30.8 (0, 152.1)     | 0.01           | 9.9 (-3.0, 23.3)     | 38.3 (-12.7, 76.4)  | 0.06           | 5.1 (0, 24.3)        | 10.0 (0.0, 90.5)     | 0.09           | 0.42           | 0.85           |
| Adiponectin            | 325 (-824, 1011)    | 8.5 (-21.6, 13.6)   | 0.50           | -587 (-2940, 982)    | -6.9 (-26.2, 15.7)  | 0.52           | 491 (-1489, 728)     | 4.4 (-24.1, 13.7)    | 0.93           | 0.65           | 0.85           |
| NFS                    | -0.1 (-0.3, 0.2)    | 12.4 (-19.9, 39.8)  | 0.27           | 0.3 (-0.3, 0.4)      | -13.6 (-25.7, 14.4) | 0.20           | -0.03 (-0.4, 0.4)    | 0.9 (-23.2, 35.4)    | 0.95           | 0.45           | 0.35           |
| Visceral Fat mass      | -18.8 (-49.1, 17.9) | -8.9 (-30.2, 9.8)   | 0.16           | -7.7 (-29.0, 21.0)   | -11.4 (-17.8, 19.2) | 0.95           | -5.3 (-38.4, 25.4)   | -4.9 (-30.9, 12.3)   | 0.61           | 0.52           | 0.49           |

Abbreviation: ALP, alkaline phosphatase; ALT, alanine aminotransferase; AST, aspartate aminotransferase; CFB: Change from baseline; GGT, gamma-glutamyl transferase; HDL, high-density lipoprotein; LDL, low-density lipoprotein; NFS, NAFLD fibrosis score; TC, total cholesterol

Values are median (interquartile range), CFB: Change from baseline

<sup>1</sup>CFB in the group was analyzed by Paired t-test or Wilcoxon signed rank test

<sup>2</sup>Comparison of CFBs in ALS-L1023 1800mg and Placebo groups by Two-sample t-test or Wilcoxon rank sum test

<sup>3</sup>Comparison of CFBs in ALS-L1023 1200mg and Placebo groups by Two-sample t-test or Wilcoxon rank sum test

**Table S2. Changes in serum biomarkers from baseline to week 8 and week 16 in the FAS**

|              |         | ALS-L1023 1800mg  |                    |                | ALS-L1023 1200mg |                     |                | Placebo        |                   |                | p <sup>2</sup> | p <sup>3</sup> |
|--------------|---------|-------------------|--------------------|----------------|------------------|---------------------|----------------|----------------|-------------------|----------------|----------------|----------------|
| Value        |         | CFB               | % CFB              | p <sup>1</sup> | CFB              | % CFB               | p <sup>1</sup> | CFB            | % CFB             | p <sup>1</sup> |                |                |
| ALT,<br>U/L  | Week 8  | 0 (-6.5, 4.3)     | 0 (-11.3, 6.2)     | 0.64           | -11 (-35.5, -2)  | -18.9 (-27.8, -3.6) | 0.01           | 2 (-4, 19)     | 2.9 (-8.7, 39.6)  | 0.22           | 0.24           | 0.01           |
|              | Week 16 | -9.5 (-16, 2.5)   | -11.2 (-29.1, 2.5) | 0.09           | -9 (-41.5, 1.5)  | -23.1 (-42.6, 6.3)  | 0.01           | 12 (-4, 30.5)  | 21 (-14.2, 46.7)  | 0.17           | 0.04           | 0.01           |
| AST,<br>IU/L | Week 8  | 2 (-6, 6)         | 4 (-15, 9.5)       | 0.76           | -4 (-23.5, 3)    | -11.8 (-29.5, 5.3)  | 0.22           | 1 (-9, 11)     | 2.2 (-20.3, 28.6) | 0.93           | 0.97           | 0.28           |
|              | Week 16 | -3 (-14.5, 3)     | -7.3 (-25.4, 9.4)  | 0.41           | -5 (-23, 4)      | -12.5 (-30.8, 7.9)  | 0.08           | 6 (-3.5, 19.5) | 9.9 (-6.4, 56.9)  | 0.28           | 0.17           | 0.04           |
| TC,<br>mg/dL | Week 8  | -2.5 (-16.3, 5.8) | -1.7 (-11.4, 3.8)  | 0.22           | -8 (-27, 1)      | -3.8 (-13.1, 0.5)   | 0.01           | -1 (-10, 14.5) | -0.7 (-7.2, 8.4)  | 0.97           | 0.29           | 0.05           |
|              | Week 16 | -3 (-14, 2)       | -1.7 (-9.3, 1.5)   | 0.16           | -4 (-24, 0.5)    | -2.9 (-12.8, 0.4)   | 0.03           | 6 (-8.5, 13)   | 3.8 (-5.6, 7.9)   | 0.51           | 0.13           | 0.04           |

Abbreviation: ALT, alanine aminotransferase; AST, aspartate aminotransferase; CFB: Change from baseline; TC, total cholesterol

Values are presented in median (interquartile range).

<sup>1</sup>CFB in the group was analyzed by Paired t-test or Wilcoxon signed rank test

<sup>2</sup>Comparison of CFBs in ALS-L1023 1800mg and Placebo groups by Two-sample t-test or Wilcoxon rank sum test

<sup>3</sup>Comparison of CFBs in ALS-L1023 1200mg and Placebo groups by Two-sample t-test or Wilcoxon rank sum test

**Table S3. Changes in serum biomarkers from baseline to week 8 and week 16 in the PPS**

|              |         | ALS-L1023 1800mg  |                    |                | ALS-L1023 1200mg  |                     |                | Placebo     |                   |                | p <sup>2</sup> | p <sup>3</sup> |
|--------------|---------|-------------------|--------------------|----------------|-------------------|---------------------|----------------|-------------|-------------------|----------------|----------------|----------------|
| Value        |         | CFB               | % CFB              | p <sup>1</sup> | CFB               | % CFB               | p <sup>1</sup> | CFB         | % CFB             | p <sup>1</sup> |                |                |
| ALT,<br>U/L  | Week 8  | 0 (-6.5, 4.3)     | 0 (-11.3, 6.2)     | 0.64           | -11 (-35.5, -3)   | -18.9 (-28.3, -4.8) | <0.01          | 2 (-3, 19)  | 2.9 (-6.3, 38)    | 0.22           | 0.2            | <0.01          |
|              | Week 16 | -9.5 (-16, 2.5)   | -11.2 (-29.1, 2.5) | 0.09           | -14 (-41.5, -5.5) | -25 (-43, -10.5)    | 0.013          | 12 (-3, 30) | 21 (-11.5, 41.4)  | 0.054          | <0.01          | <0.01          |
| AST,<br>IU/L | Week 8  | 2 (-6, 6)         | 4 (-15, 9.5)       | 0.76           | -4 (-19.5, 1.5)   | -11.8 (-32.7, 3.4)  | 0.1            | 1 (-7, 6)   | 2.2 (-17.9, 20.8) | 0.85           | 0.97           | 0.19           |
|              | Week 16 | -3 (-14.5, 3)     | -7.3 (-25.4, 9.4)  | 0.41           | -9 (-24.5, 2)     | -23.7 (-32.2, 3.2)  | 0.07           | 6 (-2, 18)  | 9.9 (-6.3, 52.4)  | 0.3            | 0.18           | 0.04           |
| TC,<br>mg/dL | Week 8  | -2.5 (-16.3, 5.8) | -1.7 (-11.4, 3.8)  | 0.22           | -16 (-29.5, -0.5) | -9.7 (-15.5, -0.5)  | <0.01          | -1 (-9, 15) | -0.7 (-6.1, 8.5)  | 0.95           | 0.30           | 0.02           |
|              | Week 16 | -3 (-14, 2)       | -1.7 (-9.3, 1.5)   | 0.16           | -4 (-23, -0.5)    | -2.9 (-12.7, -0.3)  | <0.01          | 6 (-8, 14)  | 3.8 (-4.4, 8.8)   | 0.53           | 0.12           | 0.02           |

Abbreviation: ALT, alanine aminotransferase; AST, aspartate aminotransferase; CFB: Change from baseline; TC, total cholesterol

Values are presented in median (interquartile range).

<sup>1</sup>CFB in the group was analyzed by Paired t-test or Wilcoxon signed rank test

<sup>2</sup>Comparison of CFBs in ALS-L1023 1800mg and Placebo groups by Two-sample t-test or Wilcoxon rank sum test

<sup>3</sup>Comparison of CFBs in ALS-L1023 1200mg and Placebo groups by Two-sample t-test or Wilcoxon rank sum test

**Table S4. Significantly changed miRNAs from ALS-L1023 treated patients.**

**A.**

| <b>1,800 mg ALS-L1023 treated group (V5 vs V2)</b> |                 |                                                 |              |
|----------------------------------------------------|-----------------|-------------------------------------------------|--------------|
|                                                    | <b>miRNAs</b>   | <b>Fold change (end of treatment/base line)</b> | <b>p</b>     |
| 1                                                  | hsa-let-7e-5p   | <b>-1.756</b>                                   | <b>0.006</b> |
| 2                                                  | hsa-let-7f-5p   | <b>-1.549</b>                                   | <b>0.019</b> |
| 3                                                  | hsa-miR-29a-3p  | <b>-1.536</b>                                   | <b>0.025</b> |
| 4                                                  | hsa-miR-132-3p  | <b>-1.644</b>                                   | <b>0.015</b> |
| 5                                                  | hsa-miR-1184    | <b>-1.699</b>                                   | <b>0.035</b> |
| 6                                                  | hsa-miR-3124-5p | <b>-1.561</b>                                   | <b>0.006</b> |
| 7                                                  | hsa-miR-4253    | <b>-1.508</b>                                   | <b>0.035</b> |
| 8                                                  | hsa-miR-4286    | <b>-1.622</b>                                   | <b>0.015</b> |
| 9                                                  | hsa-miR-3180    | <b>-1.580</b>                                   | <b>0.020</b> |
| 10                                                 | hsa-miR-550b-3p | <b>-1.559</b>                                   | <b>0.046</b> |
| 11                                                 | hsa-miR-4462    | <b>-1.500</b>                                   | <b>0.009</b> |
| 12                                                 | hsa-miR-4487    | <b>-1.605</b>                                   | <b>0.029</b> |
| 13                                                 | hsa-miR-4743-5p | <b>-1.569</b>                                   | <b>0.002</b> |
| 14                                                 | hsa-miR-5010-5p | <b>-1.562</b>                                   | <b>0.004</b> |
| 15                                                 | hsa-miR-664b-3p | <b>-1.696</b>                                   | <b>0.003</b> |
| 16                                                 | hsa-miR-6803-3p | <b>-1.503</b>                                   | <b>0.012</b> |
| 17                                                 | hsa-miR-6781-5p | <b>-1.523</b>                                   | <b>0.063</b> |



**B.**

| <b>1,200 mg ALS-L1023 treated group (V5 vs V2)</b> |                        |                                                 |              |
|----------------------------------------------------|------------------------|-------------------------------------------------|--------------|
|                                                    | <b>miRNAs</b>          | <b>Fold change (end of treatment/base line)</b> | <b>p</b>     |
| <b>1</b>                                           | <b>hsa-miR-361-3p</b>  | <b>-1.518</b>                                   | <b>0.019</b> |
| <b>2</b>                                           | <b>hsa-miR-455-3p</b>  | <b>-1.561</b>                                   | <b>0.002</b> |
| <b>3</b>                                           | <b>hsa-miR-1306-5p</b> | <b>-1.531</b>                                   | <b>0.021</b> |
| <b>4</b>                                           | <b>hsa-miR-1976</b>    | <b>-1.502</b>                                   | <b>0.025</b> |
| <b>5</b>                                           | <b>hsa-miR-4253</b>    | <b>-1.582</b>                                   | <b>0.011</b> |
| <b>6</b>                                           | <b>hsa-miR-378f</b>    | <b>-1.555</b>                                   | <b>0.003</b> |
| <b>7</b>                                           | <b>hsa-miR-4743-5p</b> | <b>-1.575</b>                                   | <b>0.002</b> |
| <b>8</b>                                           | <b>hsa-miR-6846-5p</b> | <b>-1.583</b>                                   | <b>0.001</b> |
| <b>9</b>                                           | <b>hsa-miR-8063</b>    | <b>-1.547</b>                                   | <b>0.024</b> |
| <b>10</b>                                          | <b>hsa-miR-371b-5p</b> | <b>-1.641</b>                                   | <b>0.010</b> |
| <b>11</b>                                          | <b>hsa-miR-6781-5p</b> | <b>-1.572</b>                                   | <b>0.006</b> |
| <b>12</b>                                          | <b>hsa-miR-6784-5p</b> | <b>-1.509</b>                                   | <b>0.007</b> |
| <b>13</b>                                          | <b>hsa-miR-3188</b>    | <b>-1.795</b>                                   | <b>0.007</b> |

C.

| <b>placebo group (V5 vs V2)</b> |                 |                                                 |              |
|---------------------------------|-----------------|-------------------------------------------------|--------------|
|                                 | <b>miRNAs</b>   | <b>Fold change (end of treatment/base line)</b> | <b>p</b>     |
| 1                               | hsa-miR-28-3p   | <b>1.550</b>                                    | <b>0.038</b> |
| 2                               | hsa-miR-139-5p  | <b>1.609</b>                                    | <b>0.034</b> |
| 3                               | hsa-miR-636     | <b>1.515</b>                                    | <b>0.033</b> |
| 4                               | hsa-miR-1224-5p | <b>-1.576</b>                                   | <b>0.025</b> |
| 5                               | hsa-miR-3188    | <b>-1.542</b>                                   | <b>0.057</b> |
| 6                               | hsa-miR-4322    | <b>-1.599</b>                                   | <b>0.032</b> |
| 7                               | hsa-miR-4640-5p | <b>-1.610</b>                                   | <b>0.018</b> |
| 8                               | hsa-miR-371b-5p | <b>-1.648</b>                                   | <b>0.077</b> |
| 9                               | hsa-miR-5001-3p | <b>1.511</b>                                    | <b>0.049</b> |
| 10                              | hsa-miR-5572    | <b>-1.542</b>                                   | <b>0.037</b> |
| 11                              | hsa-miR-6721-5p | <b>-1.650</b>                                   | <b>0.009</b> |
| 12                              | hsa-miR-6781-5p | <b>-1.793</b>                                   | <b>0.005</b> |
| 13                              | hsa-miR-6784-5p | <b>-1.663</b>                                   | <b>0.010</b> |
| 14                              | hsa-miR-6815-5p | <b>-1.824</b>                                   | <b>0.011</b> |
| 15                              | hsa-miR-6889-5p | <b>-1.566</b>                                   | <b>0.019</b> |
| 16                              | hsa-miR-8073    | <b>-1.658</b>                                   | <b>0.028</b> |

**Table S5. 6 miRNAs and their putative target transcripts.**

| Gene Symbol |          | p-value | FDR   | Odd ratio | Number of interactions | microRNA 1                  | microRNA 2      | microRNA 3     | microRNA 4     | microRNA 5 |
|-------------|----------|---------|-------|-----------|------------------------|-----------------------------|-----------------|----------------|----------------|------------|
| 1           | AFF2     | 0.002   | 0.271 | 0.045     | 2                      | hsa-let-7e-5p/hsa-let-7f-5p | hsa-miR-132-3p  |                |                |            |
| 2           | APC2     | 0.002   | 0.271 | 0.045     | 2                      | hsa-let-7e-5p/hsa-let-7f-5p | hsa-miR-1306-5p |                |                |            |
| 3           | C19orf47 | 0.001   | 0.271 | 0.034     | 2                      | hsa-let-7e-5p/hsa-let-7f-5p | hsa-miR-132-3p  |                |                |            |
| 4           | COL15A1  | 0.001   | 0.271 | 0.034     | 2                      | hsa-let-7e-5p/hsa-let-7f-5p | hsa-miR-29a-3p  |                |                |            |
| 5           | COL4A2   | 0.002   | 0.271 | 0.045     | 2                      | hsa-let-7e-5p/hsa-let-7f-5p | hsa-miR-29a-3p  |                |                |            |
| 6           | COL4A5   | 0.002   | 0.271 | 0.045     | 2                      | hsa-let-7e-5p/hsa-let-7f-5p | hsa-miR-29a-3p  |                |                |            |
| 7           | COL5A2   | 0.002   | 0.271 | 0.045     | 2                      | hsa-let-7e-5p/hsa-let-7f-5p | hsa-miR-29a-3p  |                |                |            |
| 8           | CTPS1    | 0.002   | 0.271 | 0.045     | 2                      | hsa-let-7e-5p/hsa-let-7f-5p | hsa-miR-29a-3p  |                |                |            |
| 9           | DUSP9    | 0.001   | 0.271 | 0.034     | 2                      | hsa-let-7e-5p/hsa-let-7f-5p | hsa-miR-132-3p  |                |                |            |
| 10          | GPATCH2  | 0.002   | 0.271 | 0.045     | 2                      | hsa-let-7e-5p/hsa-let-7f-5p | hsa-miR-29a-3p  |                |                |            |
| 11          | KIAA1549 | 0.002   | 0.271 | 0.182     | 4                      | hsa-let-7e-5p/hsa-let-7f-5p | hsa-miR-1306-5p | hsa-miR-132-3p | hsa-miR-29a-3p |            |
| 12          | LMLN     | 0.002   | 0.271 | 0.114     | 3                      | hsa-let-7e-5p/hsa-let-7f-5p | hsa-miR-132-3p  | hsa-miR-29a-3p |                |            |
| 13          | LRRC59   | 0.002   | 0.271 | 0.114     | 3                      | hsa-let-7e-5p/hsa-let-7f-5p | hsa-miR-1306-5p | hsa-miR-29a-3p |                |            |
| 14          | LYSMD1   | 0.002   | 0.271 | 0.045     | 2                      | hsa-miR-1306-5p             | hsa-miR-29a-3p  |                |                |            |
| 15          | NKIRAS2  | 0.002   | 0.271 | 0.098     | 3                      | hsa-let-7e-5p/hsa-let-7f-5p | hsa-miR-1306-5p | hsa-miR-29a-3p |                |            |
| 16          | NPAS4    | 0.002   | 0.271 | 0.098     | 3                      | hsa-miR-1306-5p             | hsa-miR-29a-3p  | hsa-miR-378f   |                |            |
| 17          | OTUB2    | 0.001   | 0.271 | 0.076     | 3                      | hsa-let-7e-5p/hsa-let-7f-5p | hsa-miR-29a-3p  | hsa-miR-378f   |                |            |
| 18          | PDGFB    | 0.002   | 0.271 | 0.045     | 2                      | hsa-let-7e-5p/hsa-let-7f-5p | hsa-miR-29a-3p  |                |                |            |
| 19          | POLE3    | 0.001   | 0.271 | 0.034     | 2                      | hsa-miR-132-3p              | hsa-miR-29a-3p  |                |                |            |

|    |         |       |       |       |   |                             |                 |                |                |              |
|----|---------|-------|-------|-------|---|-----------------------------|-----------------|----------------|----------------|--------------|
| 20 | PQLC2   | 0.001 | 0.271 | 0.034 | 2 | hsa-let-7e-5p/hsa-let-7f-5p | hsa-miR-1306-5p |                |                |              |
| 21 | PTAFR   | 0.002 | 0.271 | 0.045 | 2 | hsa-let-7e-5p/hsa-let-7f-5p | hsa-miR-1306-5p |                |                |              |
| 22 | RAB15   | 0.002 | 0.271 | 0.098 | 3 | hsa-let-7e-5p/hsa-let-7f-5p | hsa-miR-29a-3p  | hsa-miR-378f   |                |              |
| 23 | RAB40C  | 0.002 | 0.271 | 0.045 | 2 | hsa-let-7e-5p/hsa-let-7f-5p | hsa-miR-29a-3p  |                |                |              |
| 24 | SLC2A3  | 0.002 | 0.271 | 0.098 | 3 | hsa-miR-1306-5p             | hsa-miR-29a-3p  | hsa-miR-378f   |                |              |
| 25 | STARD9  | 0.002 | 0.271 | 0.045 | 2 | hsa-let-7e-5p/hsa-let-7f-5p | hsa-miR-29a-3p  |                |                |              |
| 26 | TRIB2   | 0.002 | 0.271 | 0.114 | 3 | hsa-let-7e-5p/hsa-let-7f-5p | hsa-miR-132-3p  | hsa-miR-29a-3p |                |              |
| 27 | AGO1    | 0.004 | 0.277 | 0.341 | 5 | hsa-let-7e-5p/hsa-let-7f-5p | hsa-miR-1306-5p | hsa-miR-132-3p | hsa-miR-29a-3p | hsa-miR-378f |
| 28 | ALPK3   | 0.021 | 0.277 | 0.125 | 2 | hsa-let-7e-5p/hsa-let-7f-5p | hsa-miR-378f    |                |                |              |
| 29 | AMOT    | 0.008 | 0.277 | 0.167 | 3 | hsa-let-7e-5p/hsa-let-7f-5p | hsa-miR-132-3p  | hsa-miR-29a-3p |                |              |
| 30 | ARL10   | 0.008 | 0.277 | 0.080 | 2 | hsa-miR-1306-5p             | hsa-miR-378f    |                |                |              |
| 31 | ARRDC4  | 0.008 | 0.277 | 0.080 | 2 | hsa-let-7e-5p/hsa-let-7f-5p | hsa-miR-29a-3p  |                |                |              |
| 32 | ATG9A   | 0.011 | 0.277 | 0.091 | 2 | hsa-miR-1306-5p             | hsa-miR-29a-3p  |                |                |              |
| 33 | B3GNT7  | 0.008 | 0.277 | 0.080 | 2 | hsa-let-7e-5p/hsa-let-7f-5p | hsa-miR-1306-5p |                |                |              |
| 34 | BCL7A   | 0.011 | 0.277 | 0.189 | 3 | hsa-let-7e-5p/hsa-let-7f-5p | hsa-miR-1306-5p | hsa-miR-29a-3p |                |              |
| 35 | BSND    | 0.008 | 0.277 | 0.080 | 2 | hsa-let-7e-5p/hsa-let-7f-5p | hsa-miR-29a-3p  |                |                |              |
| 36 | BTG2    | 0.008 | 0.277 | 0.167 | 3 | hsa-let-7e-5p/hsa-let-7f-5p | hsa-miR-132-3p  | hsa-miR-29a-3p |                |              |
| 37 | C2orf88 | 0.017 | 0.277 | 0.114 | 2 | hsa-let-7e-5p/hsa-let-7f-5p | hsa-miR-29a-3p  |                |                |              |
| 38 | CACFD1  | 0.006 | 0.277 | 0.068 | 2 | hsa-let-7e-5p/hsa-let-7f-5p | hsa-miR-29a-3p  |                |                |              |
| 39 | CACNG4  | 0.008 | 0.277 | 0.080 | 2 | hsa-let-7e-5p/hsa-let-7f-5p | hsa-miR-29a-3p  |                |                |              |
| 40 | CALU    | 0.008 | 0.277 | 0.167 | 3 | hsa-let-7e-5p/hsa-let-7f-5p | hsa-miR-132-3p  | hsa-miR-29a-3p |                |              |

|    |          |       |       |       |   |                             |                 |                |  |  |
|----|----------|-------|-------|-------|---|-----------------------------|-----------------|----------------|--|--|
| 41 | CCSAP    | 0.014 | 0.277 | 0.102 | 2 | hsa-let-7e-5p/hsa-let-7f-5p | hsa-miR-29a-3p  |                |  |  |
| 42 | CDC42BPA | 0.007 | 0.277 | 0.159 | 3 | hsa-miR-132-3p              | hsa-miR-29a-3p  | hsa-miR-378f   |  |  |
| 43 | CDKN1A   | 0.017 | 0.277 | 0.114 | 2 | hsa-let-7e-5p/hsa-let-7f-5p | hsa-miR-132-3p  |                |  |  |
| 44 | CHD8     | 0.017 | 0.277 | 0.114 | 2 | hsa-miR-1306-5p             | hsa-miR-132-3p  |                |  |  |
| 45 | COL11A1  | 0.004 | 0.277 | 0.057 | 2 | hsa-let-7e-5p/hsa-let-7f-5p | hsa-miR-29a-3p  |                |  |  |
| 46 | COL1A2   | 0.008 | 0.277 | 0.080 | 2 | hsa-let-7e-5p/hsa-let-7f-5p | hsa-miR-29a-3p  |                |  |  |
| 47 | COL24A1  | 0.011 | 0.277 | 0.091 | 2 | hsa-let-7e-5p/hsa-let-7f-5p | hsa-miR-29a-3p  |                |  |  |
| 48 | COL27A1  | 0.014 | 0.277 | 0.102 | 2 | hsa-let-7e-5p/hsa-let-7f-5p | hsa-miR-29a-3p  |                |  |  |
| 49 | COL3A1   | 0.004 | 0.277 | 0.057 | 2 | hsa-let-7e-5p/hsa-let-7f-5p | hsa-miR-29a-3p  |                |  |  |
| 50 | COL4A1   | 0.017 | 0.277 | 0.114 | 2 | hsa-let-7e-5p/hsa-let-7f-5p | hsa-miR-29a-3p  |                |  |  |
| 51 | COL4A6   | 0.004 | 0.277 | 0.057 | 2 | hsa-let-7e-5p/hsa-let-7f-5p | hsa-miR-29a-3p  |                |  |  |
| 52 | COL9A1   | 0.014 | 0.277 | 0.102 | 2 | hsa-let-7e-5p/hsa-let-7f-5p | hsa-miR-29a-3p  |                |  |  |
| 53 | CUEDC1   | 0.004 | 0.277 | 0.057 | 2 | hsa-miR-29a-3p              | hsa-miR-378f    |                |  |  |
| 54 | DAB1     | 0.007 | 0.277 | 0.159 | 3 | hsa-let-7e-5p/hsa-let-7f-5p | hsa-miR-132-3p  | hsa-miR-29a-3p |  |  |
| 55 | DIAPH1   | 0.021 | 0.277 | 0.125 | 2 | hsa-miR-1306-5p             | hsa-miR-132-3p  |                |  |  |
| 56 | DKK3     | 0.017 | 0.277 | 0.114 | 2 | hsa-let-7e-5p/hsa-let-7f-5p | hsa-miR-132-3p  |                |  |  |
| 57 | DPYSL3   | 0.007 | 0.277 | 0.159 | 3 | hsa-let-7e-5p/hsa-let-7f-5p | hsa-miR-132-3p  | hsa-miR-29a-3p |  |  |
| 58 | DSG3     | 0.004 | 0.277 | 0.057 | 2 | hsa-let-7e-5p/hsa-let-7f-5p | hsa-miR-29a-3p  |                |  |  |
| 59 | DUSP22   | 0.004 | 0.277 | 0.057 | 2 | hsa-let-7e-5p/hsa-let-7f-5p | hsa-miR-29a-3p  |                |  |  |
| 60 | EIF2S2   | 0.003 | 0.277 | 0.121 | 3 | hsa-let-7e-5p/hsa-let-7f-5p | hsa-miR-1306-5p | hsa-miR-29a-3p |  |  |
| 61 | ELOVL4   | 0.021 | 0.277 | 0.125 | 2 | hsa-let-7e-5p/hsa-let-7f-5p | hsa-miR-29a-3p  |                |  |  |

|    |          |       |       |       |   |                             |                 |                |  |  |
|----|----------|-------|-------|-------|---|-----------------------------|-----------------|----------------|--|--|
| 62 | EMB      | 0.014 | 0.277 | 0.102 | 2 | hsa-let-7e-5p/hsa-let-7f-5p | hsa-miR-29a-3p  |                |  |  |
| 63 | ERCC6    | 0.004 | 0.277 | 0.057 | 2 | hsa-let-7e-5p/hsa-let-7f-5p | hsa-miR-29a-3p  |                |  |  |
| 64 | ETNK2    | 0.017 | 0.277 | 0.114 | 2 | hsa-let-7e-5p/hsa-let-7f-5p | hsa-miR-1306-5p |                |  |  |
| 65 | FAM105B  | 0.014 | 0.277 | 0.102 | 2 | hsa-miR-132-3p              | hsa-miR-29a-3p  |                |  |  |
| 66 | FAM160B2 | 0.021 | 0.277 | 0.125 | 2 | hsa-let-7e-5p/hsa-let-7f-5p | hsa-miR-1306-5p |                |  |  |
| 67 | FAM57B   | 0.008 | 0.277 | 0.080 | 2 | hsa-miR-1306-5p             | hsa-miR-29a-3p  |                |  |  |
| 68 | FASTK    | 0.017 | 0.277 | 0.114 | 2 | hsa-let-7e-5p/hsa-let-7f-5p | hsa-miR-29a-3p  |                |  |  |
| 69 | FBXL20   | 0.014 | 0.277 | 0.205 | 3 | hsa-miR-132-3p              | hsa-miR-29a-3p  | hsa-miR-378f   |  |  |
| 70 | FREM2    | 0.021 | 0.277 | 0.125 | 2 | hsa-let-7e-5p/hsa-let-7f-5p | hsa-miR-29a-3p  |                |  |  |
| 71 | GAB2     | 0.004 | 0.277 | 0.129 | 3 | hsa-let-7e-5p/hsa-let-7f-5p | hsa-miR-1306-5p | hsa-miR-29a-3p |  |  |
| 72 | GLIPR2   | 0.021 | 0.277 | 0.125 | 2 | hsa-miR-1306-5p             | hsa-miR-378f    |                |  |  |
| 73 | GOLGA7   | 0.014 | 0.277 | 0.102 | 2 | hsa-let-7e-5p/hsa-let-7f-5p | hsa-miR-29a-3p  |                |  |  |
| 74 | GRPEL2   | 0.017 | 0.277 | 0.114 | 2 | hsa-let-7e-5p/hsa-let-7f-5p | hsa-miR-29a-3p  |                |  |  |
| 75 | HAS2     | 0.017 | 0.277 | 0.220 | 3 | hsa-let-7e-5p/hsa-let-7f-5p | hsa-miR-132-3p  | hsa-miR-29a-3p |  |  |
| 76 | HBEGF    | 0.004 | 0.277 | 0.136 | 3 | hsa-let-7e-5p/hsa-let-7f-5p | hsa-miR-132-3p  | hsa-miR-29a-3p |  |  |
| 77 | HIF3A    | 0.011 | 0.277 | 0.091 | 2 | hsa-let-7e-5p/hsa-let-7f-5p | hsa-miR-29a-3p  |                |  |  |
| 78 | ICOS     | 0.006 | 0.277 | 0.068 | 2 | hsa-let-7e-5p/hsa-let-7f-5p | hsa-miR-29a-3p  |                |  |  |
| 79 | IGSF1    | 0.008 | 0.277 | 0.080 | 2 | hsa-let-7e-5p/hsa-let-7f-5p | hsa-miR-29a-3p  |                |  |  |
| 80 | IRGQ     | 0.011 | 0.277 | 0.091 | 2 | hsa-let-7e-5p/hsa-let-7f-5p | hsa-miR-29a-3p  |                |  |  |
| 81 | KATNBL1  | 0.008 | 0.277 | 0.167 | 3 | hsa-let-7e-5p/hsa-let-7f-5p | hsa-miR-1306-5p | hsa-miR-29a-3p |  |  |
| 82 | KCNJ12   | 0.014 | 0.277 | 0.102 | 2 | hsa-miR-132-3p              | hsa-miR-29a-3p  |                |  |  |

|     |              |       |       |       |   |                             |                 |                |  |  |
|-----|--------------|-------|-------|-------|---|-----------------------------|-----------------|----------------|--|--|
| 83  | KCNV1        | 0.008 | 0.277 | 0.080 | 2 | hsa-let-7e-5p/hsa-let-7f-5p | hsa-miR-29a-3p  |                |  |  |
| 84  | KIAA0895L    | 0.008 | 0.277 | 0.080 | 2 | hsa-let-7e-5p/hsa-let-7f-5p | hsa-miR-29a-3p  |                |  |  |
| 85  | KIF2A        | 0.021 | 0.277 | 0.235 | 3 | hsa-let-7e-5p/hsa-let-7f-5p | hsa-miR-132-3p  | hsa-miR-378f   |  |  |
| 86  | LOXL4        | 0.008 | 0.277 | 0.080 | 2 | hsa-let-7e-5p/hsa-let-7f-5p | hsa-miR-29a-3p  |                |  |  |
| 87  | LSM11        | 0.004 | 0.277 | 0.136 | 3 | hsa-let-7e-5p/hsa-let-7f-5p | hsa-miR-132-3p  | hsa-miR-29a-3p |  |  |
| 88  | MED28        | 0.021 | 0.277 | 0.125 | 2 | hsa-let-7e-5p/hsa-let-7f-5p | hsa-miR-29a-3p  |                |  |  |
| 89  | MEPCE        | 0.014 | 0.277 | 0.102 | 2 | hsa-miR-1306-5p             | hsa-miR-132-3p  |                |  |  |
| 90  | MIF4GD       | 0.008 | 0.277 | 0.080 | 2 | hsa-miR-1306-5p             | hsa-miR-29a-3p  |                |  |  |
| 91  | NUP155       | 0.008 | 0.277 | 0.080 | 2 | hsa-let-7e-5p/hsa-let-7f-5p | hsa-miR-378f    |                |  |  |
| 92  | PAG1         | 0.019 | 0.277 | 0.227 | 3 | hsa-let-7e-5p/hsa-let-7f-5p | hsa-miR-29a-3p  | hsa-miR-378f   |  |  |
| 93  | PAIP2        | 0.021 | 0.277 | 0.125 | 2 | hsa-miR-132-3p              | hsa-miR-29a-3p  |                |  |  |
| 94  | PCGF3        | 0.017 | 0.277 | 0.220 | 3 | hsa-let-7e-5p/hsa-let-7f-5p | hsa-miR-132-3p  | hsa-miR-29a-3p |  |  |
| 95  | PIAS4        | 0.021 | 0.277 | 0.125 | 2 | hsa-let-7e-5p/hsa-let-7f-5p | hsa-miR-29a-3p  |                |  |  |
| 96  | PIK3IP1      | 0.014 | 0.277 | 0.102 | 2 | hsa-let-7e-5p/hsa-let-7f-5p | hsa-miR-132-3p  |                |  |  |
| 97  | POC1B-GALNT4 | 0.006 | 0.277 | 0.152 | 3 | hsa-let-7e-5p/hsa-let-7f-5p | hsa-miR-1306-5p | hsa-miR-132-3p |  |  |
| 98  | PRICKLE2     | 0.016 | 0.277 | 0.212 | 3 | hsa-miR-1306-5p             | hsa-miR-132-3p  | hsa-miR-29a-3p |  |  |
| 99  | RASGRP1      | 0.008 | 0.277 | 0.080 | 2 | hsa-let-7e-5p/hsa-let-7f-5p | hsa-miR-132-3p  |                |  |  |
| 100 | RB1          | 0.011 | 0.277 | 0.091 | 2 | hsa-let-7e-5p/hsa-let-7f-5p | hsa-miR-132-3p  |                |  |  |
| 101 | RCSD1        | 0.006 | 0.277 | 0.068 | 2 | hsa-let-7e-5p/hsa-let-7f-5p | hsa-miR-1306-5p |                |  |  |
| 102 | RIOK3        | 0.014 | 0.277 | 0.102 | 2 | hsa-let-7e-5p/hsa-let-7f-5p | hsa-miR-29a-3p  |                |  |  |
| 103 | RIT1         | 0.017 | 0.277 | 0.114 | 2 | hsa-miR-29a-3p              | hsa-miR-378f    |                |  |  |

|     |          |       |       |       |   |                             |                 |                |              |  |
|-----|----------|-------|-------|-------|---|-----------------------------|-----------------|----------------|--------------|--|
| 104 | SALL3    | 0.017 | 0.277 | 0.114 | 2 | hsa-let-7e-5p/hsa-let-7f-5p | hsa-miR-132-3p  |                |              |  |
| 105 | SAP30L   | 0.013 | 0.277 | 0.197 | 3 | hsa-let-7e-5p/hsa-let-7f-5p | hsa-miR-132-3p  | hsa-miR-29a-3p |              |  |
| 106 | SARM1    | 0.011 | 0.277 | 0.091 | 2 | hsa-miR-29a-3p              | hsa-miR-378f    |                |              |  |
| 107 | SFT2D3   | 0.008 | 0.277 | 0.080 | 2 | hsa-let-7e-5p/hsa-let-7f-5p | hsa-miR-378f    |                |              |  |
| 108 | SH3RF3   | 0.011 | 0.277 | 0.091 | 2 | hsa-let-7e-5p/hsa-let-7f-5p | hsa-miR-29a-3p  |                |              |  |
| 109 | SIX5     | 0.021 | 0.277 | 0.125 | 2 | hsa-miR-29a-3p              | hsa-miR-378f    |                |              |  |
| 110 | SLC10A7  | 0.006 | 0.277 | 0.152 | 3 | hsa-let-7e-5p/hsa-let-7f-5p | hsa-miR-132-3p  | hsa-miR-29a-3p |              |  |
| 111 | SLC16A14 | 0.017 | 0.277 | 0.114 | 2 | hsa-let-7e-5p/hsa-let-7f-5p | hsa-miR-29a-3p  |                |              |  |
| 112 | SLC2A14  | 0.021 | 0.277 | 0.125 | 2 | hsa-miR-29a-3p              | hsa-miR-378f    |                |              |  |
| 113 | SLC31A1  | 0.006 | 0.277 | 0.152 | 3 | hsa-let-7e-5p/hsa-let-7f-5p | hsa-miR-132-3p  | hsa-miR-29a-3p |              |  |
| 114 | SLCO5A1  | 0.017 | 0.277 | 0.114 | 2 | hsa-let-7e-5p/hsa-let-7f-5p | hsa-miR-29a-3p  |                |              |  |
| 115 | SOX6     | 0.015 | 0.277 | 0.313 | 4 | hsa-let-7e-5p/hsa-let-7f-5p | hsa-miR-132-3p  | hsa-miR-29a-3p | hsa-miR-378f |  |
| 116 | TMEM2    | 0.017 | 0.277 | 0.114 | 2 | hsa-let-7e-5p/hsa-let-7f-5p | hsa-miR-132-3p  |                |              |  |
| 117 | TMEM234  | 0.004 | 0.277 | 0.057 | 2 | hsa-let-7e-5p/hsa-let-7f-5p | hsa-miR-29a-3p  |                |              |  |
| 118 | UBTF     | 0.008 | 0.277 | 0.080 | 2 | hsa-miR-1306-5p             | hsa-miR-29a-3p  |                |              |  |
| 119 | USP38    | 0.006 | 0.277 | 0.152 | 3 | hsa-let-7e-5p/hsa-let-7f-5p | hsa-miR-1306-5p | hsa-miR-132-3p |              |  |
| 120 | WARS2    | 0.006 | 0.277 | 0.068 | 2 | hsa-let-7e-5p/hsa-let-7f-5p | hsa-miR-1306-5p |                |              |  |
| 121 | WSCD2    | 0.011 | 0.277 | 0.091 | 2 | hsa-miR-1306-5p             | hsa-miR-29a-3p  |                |              |  |
| 122 | XPO5     | 0.021 | 0.277 | 0.125 | 2 | hsa-miR-29a-3p              | hsa-miR-378f    |                |              |  |
| 123 | ZNF282   | 0.006 | 0.277 | 0.068 | 2 | hsa-let-7e-5p/hsa-let-7f-5p | hsa-miR-29a-3p  |                |              |  |
| 124 | ZNF652   | 0.022 | 0.277 | 0.347 | 4 | hsa-let-7e-5p/hsa-let-7f-5p | hsa-miR-1306-5p | hsa-miR-132-3p | hsa-miR-378f |  |



|     |          |       |       |       |   |                             |                 |                |              |  |
|-----|----------|-------|-------|-------|---|-----------------------------|-----------------|----------------|--------------|--|
| 125 | CBX5     | 0.023 | 0.280 | 0.352 | 4 | hsa-let-7e-5p/hsa-let-7f-5p | hsa-miR-1306-5p | hsa-miR-29a-3p | hsa-miR-378f |  |
| 126 | ALS2     | 0.025 | 0.283 | 0.136 | 2 | hsa-miR-29a-3p              | hsa-miR-378f    |                |              |  |
| 127 | AP1S1    | 0.025 | 0.283 | 0.136 | 2 | hsa-let-7e-5p/hsa-let-7f-5p | hsa-miR-29a-3p  |                |              |  |
| 128 | B3GNT1   | 0.025 | 0.283 | 0.136 | 2 | hsa-let-7e-5p/hsa-let-7f-5p | hsa-miR-1306-5p |                |              |  |
| 129 | CBX3     | 0.025 | 0.283 | 0.136 | 2 | hsa-miR-29a-3p              | hsa-miR-378f    |                |              |  |
| 130 | CDC42SE1 | 0.025 | 0.283 | 0.136 | 2 | hsa-let-7e-5p/hsa-let-7f-5p | hsa-miR-29a-3p  |                |              |  |
| 131 | COL1A1   | 0.025 | 0.283 | 0.136 | 2 | hsa-let-7e-5p/hsa-let-7f-5p | hsa-miR-29a-3p  |                |              |  |
| 132 | CPM      | 0.025 | 0.283 | 0.136 | 2 | hsa-let-7e-5p/hsa-let-7f-5p | hsa-miR-29a-3p  |                |              |  |
| 133 | DCAF8    | 0.025 | 0.283 | 0.136 | 2 | hsa-let-7e-5p/hsa-let-7f-5p | hsa-miR-132-3p  |                |              |  |
| 134 | FAM83F   | 0.025 | 0.283 | 0.250 | 3 | hsa-miR-1306-5p             | hsa-miR-29a-3p  | hsa-miR-378f   |              |  |
| 135 | FRAS1    | 0.025 | 0.283 | 0.136 | 2 | hsa-let-7e-5p/hsa-let-7f-5p | hsa-miR-29a-3p  |                |              |  |
| 136 | GPR37L1  | 0.025 | 0.283 | 0.136 | 2 | hsa-miR-1306-5p             | hsa-miR-132-3p  |                |              |  |
| 137 | MAPKBP1  | 0.025 | 0.283 | 0.136 | 2 | hsa-miR-132-3p              | hsa-miR-29a-3p  |                |              |  |
| 138 | NCOR1    | 0.025 | 0.283 | 0.136 | 2 | hsa-let-7e-5p/hsa-let-7f-5p | hsa-miR-132-3p  |                |              |  |
| 139 | PIK3CA   | 0.025 | 0.283 | 0.250 | 3 | hsa-let-7e-5p/hsa-let-7f-5p | hsa-miR-132-3p  | hsa-miR-29a-3p |              |  |
| 140 | PXDN     | 0.025 | 0.283 | 0.136 | 2 | hsa-let-7e-5p/hsa-let-7f-5p | hsa-miR-29a-3p  |                |              |  |
| 141 | RNF144B  | 0.025 | 0.283 | 0.136 | 2 | hsa-miR-29a-3p              | hsa-miR-378f    |                |              |  |
| 142 | SDK1     | 0.025 | 0.283 | 0.136 | 2 | hsa-let-7e-5p/hsa-let-7f-5p | hsa-miR-29a-3p  |                |              |  |
| 143 | ZNF362   | 0.025 | 0.283 | 0.136 | 2 | hsa-let-7e-5p/hsa-let-7f-5p | hsa-miR-29a-3p  |                |              |  |
| 144 | ABHD5    | 0.029 | 0.299 | 0.148 | 2 | hsa-miR-132-3p              | hsa-miR-29a-3p  |                |              |  |
| 145 | ADAMTS5  | 0.040 | 0.299 | 0.295 | 3 | hsa-let-7e-5p/hsa-let-7f-5p | hsa-miR-132-3p  | hsa-miR-29a-3p |              |  |

|     |          |       |       |       |   |                             |                 |                |  |  |
|-----|----------|-------|-------|-------|---|-----------------------------|-----------------|----------------|--|--|
| 146 | AKAP5    | 0.034 | 0.299 | 0.159 | 2 | hsa-let-7e-5p/hsa-let-7f-5p | hsa-miR-29a-3p  |                |  |  |
| 147 | AMMECR1L | 0.039 | 0.299 | 0.170 | 2 | hsa-let-7e-5p/hsa-let-7f-5p | hsa-miR-29a-3p  |                |  |  |
| 148 | ARID1B   | 0.039 | 0.299 | 0.170 | 2 | hsa-miR-132-3p              | hsa-miR-29a-3p  |                |  |  |
| 149 | B3GALT1  | 0.044 | 0.299 | 0.182 | 2 | hsa-let-7e-5p/hsa-let-7f-5p | hsa-miR-29a-3p  |                |  |  |
| 150 | BCL2L2   | 0.027 | 0.299 | 0.258 | 3 | hsa-miR-1306-5p             | hsa-miR-29a-3p  | hsa-miR-378f   |  |  |
| 151 | CLMN     | 0.039 | 0.299 | 0.170 | 2 | hsa-miR-132-3p              | hsa-miR-29a-3p  |                |  |  |
| 152 | CNOT2    | 0.030 | 0.299 | 0.265 | 3 | hsa-let-7e-5p/hsa-let-7f-5p | hsa-miR-1306-5p | hsa-miR-132-3p |  |  |
| 153 | COLEC10  | 0.034 | 0.299 | 0.159 | 2 | hsa-miR-1306-5p             | hsa-miR-132-3p  |                |  |  |
| 154 | DCX      | 0.035 | 0.299 | 0.280 | 3 | hsa-let-7e-5p/hsa-let-7f-5p | hsa-miR-29a-3p  | hsa-miR-378f   |  |  |
| 155 | DNAH10OS | 0.034 | 0.299 | 0.159 | 2 | hsa-let-7e-5p/hsa-let-7f-5p | hsa-miR-1306-5p |                |  |  |
| 156 | DTX4     | 0.044 | 0.299 | 0.182 | 2 | hsa-let-7e-5p/hsa-let-7f-5p | hsa-miR-29a-3p  |                |  |  |
| 157 | E2F5     | 0.029 | 0.299 | 0.148 | 2 | hsa-let-7e-5p/hsa-let-7f-5p | hsa-miR-132-3p  |                |  |  |
| 158 | FAM167A  | 0.034 | 0.299 | 0.159 | 2 | hsa-miR-132-3p              | hsa-miR-29a-3p  |                |  |  |
| 159 | FAM84B   | 0.034 | 0.299 | 0.159 | 2 | hsa-let-7e-5p/hsa-let-7f-5p | hsa-miR-29a-3p  |                |  |  |
| 160 | FBXL19   | 0.039 | 0.299 | 0.170 | 2 | hsa-let-7e-5p/hsa-let-7f-5p | hsa-miR-1306-5p |                |  |  |
| 161 | GAS7     | 0.044 | 0.299 | 0.182 | 2 | hsa-let-7e-5p/hsa-let-7f-5p | hsa-miR-29a-3p  |                |  |  |
| 162 | GOPC     | 0.034 | 0.299 | 0.159 | 2 | hsa-let-7e-5p/hsa-let-7f-5p | hsa-miR-29a-3p  |                |  |  |
| 163 | HEY2     | 0.039 | 0.299 | 0.170 | 2 | hsa-miR-1306-5p             | hsa-miR-29a-3p  |                |  |  |
| 164 | HIP1     | 0.044 | 0.299 | 0.182 | 2 | hsa-let-7e-5p/hsa-let-7f-5p | hsa-miR-29a-3p  |                |  |  |
| 165 | HOXD12   | 0.029 | 0.299 | 0.148 | 2 | hsa-miR-132-3p              | hsa-miR-29a-3p  |                |  |  |
| 166 | IGF1     | 0.032 | 0.299 | 0.273 | 3 | hsa-let-7e-5p/hsa-let-7f-5p | hsa-miR-29a-3p  | hsa-miR-378f   |  |  |

|     |          |       |       |       |   |                             |                 |                |  |  |
|-----|----------|-------|-------|-------|---|-----------------------------|-----------------|----------------|--|--|
| 167 | ISL1     | 0.029 | 0.299 | 0.148 | 2 | hsa-miR-132-3p              | hsa-miR-29a-3p  |                |  |  |
| 168 | KCNA6    | 0.029 | 0.299 | 0.148 | 2 | hsa-let-7e-5p/hsa-let-7f-5p | hsa-miR-132-3p  |                |  |  |
| 169 | KCTD15   | 0.039 | 0.299 | 0.170 | 2 | hsa-let-7e-5p/hsa-let-7f-5p | hsa-miR-29a-3p  |                |  |  |
| 170 | KIAA1644 | 0.034 | 0.299 | 0.159 | 2 | hsa-miR-1306-5p             | hsa-miR-29a-3p  |                |  |  |
| 171 | LBH      | 0.034 | 0.299 | 0.159 | 2 | hsa-let-7e-5p/hsa-let-7f-5p | hsa-miR-1306-5p |                |  |  |
| 172 | LMX1A    | 0.039 | 0.299 | 0.170 | 2 | hsa-let-7e-5p/hsa-let-7f-5p | hsa-miR-29a-3p  |                |  |  |
| 173 | MAP4K4   | 0.044 | 0.299 | 0.182 | 2 | hsa-let-7e-5p/hsa-let-7f-5p | hsa-miR-29a-3p  |                |  |  |
| 174 | MIEF1    | 0.039 | 0.299 | 0.170 | 2 | hsa-let-7e-5p/hsa-let-7f-5p | hsa-miR-29a-3p  |                |  |  |
| 175 | MTMR9    | 0.044 | 0.299 | 0.182 | 2 | hsa-miR-1306-5p             | hsa-miR-29a-3p  |                |  |  |
| 176 | NANOS1   | 0.039 | 0.299 | 0.170 | 2 | hsa-miR-1306-5p             | hsa-miR-29a-3p  |                |  |  |
| 177 | NHLRC2   | 0.044 | 0.299 | 0.182 | 2 | hsa-let-7e-5p/hsa-let-7f-5p | hsa-miR-29a-3p  |                |  |  |
| 178 | PCYT1B   | 0.044 | 0.299 | 0.182 | 2 | hsa-let-7e-5p/hsa-let-7f-5p | hsa-miR-29a-3p  |                |  |  |
| 179 | PDP2     | 0.044 | 0.299 | 0.182 | 2 | hsa-let-7e-5p/hsa-let-7f-5p | hsa-miR-29a-3p  |                |  |  |
| 180 | PPP1R15B | 0.044 | 0.299 | 0.182 | 2 | hsa-let-7e-5p/hsa-let-7f-5p | hsa-miR-29a-3p  |                |  |  |
| 181 | PRR14L   | 0.027 | 0.299 | 0.258 | 3 | hsa-let-7e-5p/hsa-let-7f-5p | hsa-miR-132-3p  | hsa-miR-29a-3p |  |  |
| 182 | PTPRD    | 0.043 | 0.299 | 0.303 | 3 | hsa-let-7e-5p/hsa-let-7f-5p | hsa-miR-132-3p  | hsa-miR-29a-3p |  |  |
| 183 | PTRH2    | 0.029 | 0.299 | 0.148 | 2 | hsa-miR-29a-3p              | hsa-miR-378f    |                |  |  |
| 184 | PXMP4    | 0.044 | 0.299 | 0.182 | 2 | hsa-let-7e-5p/hsa-let-7f-5p | hsa-miR-29a-3p  |                |  |  |
| 185 | RBFOX1   | 0.029 | 0.299 | 0.148 | 2 | hsa-let-7e-5p/hsa-let-7f-5p | hsa-miR-132-3p  |                |  |  |
| 186 | RBMS2    | 0.039 | 0.299 | 0.170 | 2 | hsa-let-7e-5p/hsa-let-7f-5p | hsa-miR-29a-3p  |                |  |  |
| 187 | REL      | 0.034 | 0.299 | 0.159 | 2 | hsa-let-7e-5p/hsa-let-7f-5p | hsa-miR-29a-3p  |                |  |  |

|     |          |       |       |       |   |                             |                 |              |  |  |
|-----|----------|-------|-------|-------|---|-----------------------------|-----------------|--------------|--|--|
| 188 | SCN5A    | 0.034 | 0.299 | 0.159 | 2 | hsa-let-7e-5p/hsa-let-7f-5p | hsa-miR-378f    |              |  |  |
| 189 | SCYL3    | 0.044 | 0.299 | 0.182 | 2 | hsa-let-7e-5p/hsa-let-7f-5p | hsa-miR-132-3p  |              |  |  |
| 190 | SETD5    | 0.039 | 0.299 | 0.170 | 2 | hsa-miR-132-3p              | hsa-miR-29a-3p  |              |  |  |
| 191 | SLC30A6  | 0.039 | 0.299 | 0.170 | 2 | hsa-let-7e-5p/hsa-let-7f-5p | hsa-miR-132-3p  |              |  |  |
| 192 | SLC39A13 | 0.039 | 0.299 | 0.170 | 2 | hsa-miR-1306-5p             | hsa-miR-29a-3p  |              |  |  |
| 193 | SPAST    | 0.029 | 0.299 | 0.148 | 2 | hsa-miR-132-3p              | hsa-miR-29a-3p  |              |  |  |
| 194 | STAT3    | 0.034 | 0.299 | 0.159 | 2 | hsa-let-7e-5p/hsa-let-7f-5p | hsa-miR-29a-3p  |              |  |  |
| 195 | STX17    | 0.039 | 0.299 | 0.170 | 2 | hsa-let-7e-5p/hsa-let-7f-5p | hsa-miR-29a-3p  |              |  |  |
| 196 | SUB1     | 0.039 | 0.299 | 0.170 | 2 | hsa-let-7e-5p/hsa-let-7f-5p | hsa-miR-29a-3p  |              |  |  |
| 197 | SYT7     | 0.044 | 0.299 | 0.182 | 2 | hsa-let-7e-5p/hsa-let-7f-5p | hsa-miR-29a-3p  |              |  |  |
| 198 | TADA2B   | 0.044 | 0.299 | 0.182 | 2 | hsa-miR-132-3p              | hsa-miR-29a-3p  |              |  |  |
| 199 | TMED5    | 0.039 | 0.299 | 0.170 | 2 | hsa-let-7e-5p/hsa-let-7f-5p | hsa-miR-132-3p  |              |  |  |
| 200 | TMEM255A | 0.039 | 0.299 | 0.170 | 2 | hsa-let-7e-5p/hsa-let-7f-5p | hsa-miR-29a-3p  |              |  |  |
| 201 | TMTC3    | 0.039 | 0.299 | 0.170 | 2 | hsa-let-7e-5p/hsa-let-7f-5p | hsa-miR-29a-3p  |              |  |  |
| 202 | TNFAIP3  | 0.034 | 0.299 | 0.159 | 2 | hsa-let-7e-5p/hsa-let-7f-5p | hsa-miR-29a-3p  |              |  |  |
| 203 | TSPAN9   | 0.039 | 0.299 | 0.170 | 2 | hsa-miR-1306-5p             | hsa-miR-29a-3p  |              |  |  |
| 204 | WDR37    | 0.030 | 0.299 | 0.265 | 3 | hsa-let-7e-5p/hsa-let-7f-5p | hsa-miR-29a-3p  | hsa-miR-378f |  |  |
| 205 | WNT9B    | 0.044 | 0.299 | 0.182 | 2 | hsa-let-7e-5p/hsa-let-7f-5p | hsa-miR-1306-5p |              |  |  |
| 206 | XKRX     | 0.029 | 0.299 | 0.148 | 2 | hsa-let-7e-5p/hsa-let-7f-5p | hsa-miR-29a-3p  |              |  |  |
| 207 | YY1      | 0.032 | 0.299 | 0.273 | 3 | hsa-let-7e-5p/hsa-let-7f-5p | hsa-miR-29a-3p  | hsa-miR-378f |  |  |
| 208 | ZNF512B  | 0.034 | 0.299 | 0.159 | 2 | hsa-let-7e-5p/hsa-let-7f-5p | hsa-miR-29a-3p  |              |  |  |

|     |          |       |       |       |   |                             |                 |                |  |  |
|-----|----------|-------|-------|-------|---|-----------------------------|-----------------|----------------|--|--|
| 209 | ZNF641   | 0.039 | 0.299 | 0.170 | 2 | hsa-let-7e-5p/hsa-let-7f-5p | hsa-miR-29a-3p  |                |  |  |
| 210 | KCNJ6    | 0.046 | 0.304 | 0.311 | 3 | hsa-let-7e-5p/hsa-let-7f-5p | hsa-miR-132-3p  | hsa-miR-29a-3p |  |  |
| 211 | KPNA1    | 0.046 | 0.304 | 0.311 | 3 | hsa-let-7e-5p/hsa-let-7f-5p | hsa-miR-132-3p  | hsa-miR-29a-3p |  |  |
| 212 | CCDC117  | 0.049 | 0.316 | 0.193 | 2 | hsa-miR-132-3p              | hsa-miR-29a-3p  |                |  |  |
| 213 | DCUN1D3  | 0.049 | 0.316 | 0.318 | 3 | hsa-let-7e-5p/hsa-let-7f-5p | hsa-miR-1306-5p | hsa-miR-132-3p |  |  |
| 214 | FBXO21   | 0.049 | 0.316 | 0.193 | 2 | hsa-let-7e-5p/hsa-let-7f-5p | hsa-miR-132-3p  |                |  |  |
| 215 | GNS      | 0.049 | 0.316 | 0.193 | 2 | hsa-let-7e-5p/hsa-let-7f-5p | hsa-miR-29a-3p  |                |  |  |
| 216 | IPO9     | 0.049 | 0.316 | 0.193 | 2 | hsa-let-7e-5p/hsa-let-7f-5p | hsa-miR-378f    |                |  |  |
| 217 | KIAA1958 | 0.049 | 0.316 | 0.193 | 2 | hsa-let-7e-5p/hsa-let-7f-5p | hsa-miR-132-3p  |                |  |  |
| 218 | MEIS1    | 0.049 | 0.316 | 0.318 | 3 | hsa-let-7e-5p/hsa-let-7f-5p | hsa-miR-1306-5p | hsa-miR-132-3p |  |  |
| 219 | MYCN     | 0.049 | 0.316 | 0.193 | 2 | hsa-let-7e-5p/hsa-let-7f-5p | hsa-miR-29a-3p  |                |  |  |
| 220 | NREP     | 0.049 | 0.316 | 0.193 | 2 | hsa-miR-132-3p              | hsa-miR-29a-3p  |                |  |  |
| 221 | SEMA4G   | 0.049 | 0.316 | 0.193 | 2 | hsa-let-7e-5p/hsa-let-7f-5p | hsa-miR-132-3p  |                |  |  |
| 222 | SLK      | 0.049 | 0.316 | 0.193 | 2 | hsa-let-7e-5p/hsa-let-7f-5p | hsa-miR-29a-3p  |                |  |  |
| 223 | XKR4     | 0.049 | 0.316 | 0.318 | 3 | hsa-let-7e-5p/hsa-let-7f-5p | hsa-miR-1306-5p | hsa-miR-29a-3p |  |  |
| 224 | ZBTB5    | 0.049 | 0.316 | 0.193 | 2 | hsa-let-7e-5p/hsa-let-7f-5p | hsa-miR-29a-3p  |                |  |  |
| 225 | BMP2     | 0.067 | 0.321 | 0.227 | 2 | hsa-let-7e-5p/hsa-let-7f-5p | hsa-miR-378f    |                |  |  |
| 226 | C11orf57 | 0.055 | 0.321 | 0.205 | 2 | hsa-let-7e-5p/hsa-let-7f-5p | hsa-miR-29a-3p  |                |  |  |
| 227 | C16orf87 | 0.067 | 0.321 | 0.227 | 2 | hsa-miR-132-3p              | hsa-miR-29a-3p  |                |  |  |
| 228 | COL4A4   | 0.055 | 0.321 | 0.205 | 2 | hsa-miR-132-3p              | hsa-miR-29a-3p  |                |  |  |
| 229 | CSRNP3   | 0.059 | 0.321 | 0.341 | 3 | hsa-let-7e-5p/hsa-let-7f-5p | hsa-miR-132-3p  | hsa-miR-378f   |  |  |

|     |         |       |       |       |   |                             |                |                |  |  |
|-----|---------|-------|-------|-------|---|-----------------------------|----------------|----------------|--|--|
| 230 | CYTH3   | 0.055 | 0.321 | 0.205 | 2 | hsa-let-7e-5p/hsa-let-7f-5p | hsa-miR-29a-3p |                |  |  |
| 231 | DCUN1D4 | 0.067 | 0.321 | 0.227 | 2 | hsa-miR-132-3p              | hsa-miR-29a-3p |                |  |  |
| 232 | DDI2    | 0.063 | 0.321 | 0.348 | 3 | hsa-let-7e-5p/hsa-let-7f-5p | hsa-miR-29a-3p | hsa-miR-378f   |  |  |
| 233 | DENND6A | 0.067 | 0.321 | 0.227 | 2 | hsa-let-7e-5p/hsa-let-7f-5p | hsa-miR-29a-3p |                |  |  |
| 234 | DNAJA2  | 0.055 | 0.321 | 0.205 | 2 | hsa-let-7e-5p/hsa-let-7f-5p | hsa-miR-132-3p |                |  |  |
| 235 | DNAJB14 | 0.055 | 0.321 | 0.205 | 2 | hsa-let-7e-5p/hsa-let-7f-5p | hsa-miR-29a-3p |                |  |  |
| 236 | DNMT3A  | 0.063 | 0.321 | 0.348 | 3 | hsa-miR-1306-5p             | hsa-miR-132-3p | hsa-miR-29a-3p |  |  |
| 237 | ENTPD7  | 0.067 | 0.321 | 0.227 | 2 | hsa-let-7e-5p/hsa-let-7f-5p | hsa-miR-29a-3p |                |  |  |
| 238 | FOXP1   | 0.056 | 0.321 | 0.333 | 3 | hsa-let-7e-5p/hsa-let-7f-5p | hsa-miR-132-3p | hsa-miR-29a-3p |  |  |
| 239 | JMY     | 0.055 | 0.321 | 0.205 | 2 | hsa-miR-132-3p              | hsa-miR-29a-3p |                |  |  |
| 240 | KIF21B  | 0.055 | 0.321 | 0.205 | 2 | hsa-let-7e-5p/hsa-let-7f-5p | hsa-miR-132-3p |                |  |  |
| 241 | KIF26B  | 0.067 | 0.321 | 0.227 | 2 | hsa-miR-29a-3p              | hsa-miR-378f   |                |  |  |
| 242 | LPPR5   | 0.055 | 0.321 | 0.205 | 2 | hsa-miR-1306-5p             | hsa-miR-29a-3p |                |  |  |
| 243 | MOB1B   | 0.061 | 0.321 | 0.216 | 2 | hsa-miR-1306-5p             | hsa-miR-29a-3p |                |  |  |
| 244 | OSBPL3  | 0.055 | 0.321 | 0.205 | 2 | hsa-let-7e-5p/hsa-let-7f-5p | hsa-miR-29a-3p |                |  |  |
| 245 | PITPNM3 | 0.061 | 0.321 | 0.216 | 2 | hsa-let-7e-5p/hsa-let-7f-5p | hsa-miR-29a-3p |                |  |  |
| 246 | PLEKHA8 | 0.067 | 0.321 | 0.227 | 2 | hsa-let-7e-5p/hsa-let-7f-5p | hsa-miR-29a-3p |                |  |  |
| 247 | PPP3CA  | 0.067 | 0.321 | 0.227 | 2 | hsa-let-7e-5p/hsa-let-7f-5p | hsa-miR-132-3p |                |  |  |
| 248 | PRKAB2  | 0.061 | 0.321 | 0.216 | 2 | hsa-let-7e-5p/hsa-let-7f-5p | hsa-miR-29a-3p |                |  |  |
| 249 | RAB6B   | 0.055 | 0.321 | 0.205 | 2 | hsa-miR-132-3p              | hsa-miR-29a-3p |                |  |  |
| 250 | RCC2    | 0.055 | 0.321 | 0.205 | 2 | hsa-miR-29a-3p              | hsa-miR-378f   |                |  |  |

|     |            |       |       |       |   |                             |                 |                |  |  |
|-----|------------|-------|-------|-------|---|-----------------------------|-----------------|----------------|--|--|
| 251 | SLC39A9    | 0.055 | 0.321 | 0.205 | 2 | hsa-miR-1306-5p             | hsa-miR-29a-3p  |                |  |  |
| 252 | SMARCC1    | 0.055 | 0.321 | 0.205 | 2 | hsa-let-7e-5p/hsa-let-7f-5p | hsa-miR-29a-3p  |                |  |  |
| 253 | SPRY1      | 0.067 | 0.321 | 0.227 | 2 | hsa-miR-132-3p              | hsa-miR-29a-3p  |                |  |  |
| 254 | TMEM178B   | 0.059 | 0.321 | 0.341 | 3 | hsa-let-7e-5p/hsa-let-7f-5p | hsa-miR-132-3p  | hsa-miR-29a-3p |  |  |
| 255 | TOB2       | 0.055 | 0.321 | 0.205 | 2 | hsa-let-7e-5p/hsa-let-7f-5p | hsa-miR-378f    |                |  |  |
| 256 | VAT1       | 0.067 | 0.321 | 0.227 | 2 | hsa-miR-1306-5p             | hsa-miR-378f    |                |  |  |
| 257 | ZBTB8B     | 0.055 | 0.321 | 0.205 | 2 | hsa-let-7e-5p/hsa-let-7f-5p | hsa-miR-29a-3p  |                |  |  |
| 258 | ZCCHC11    | 0.055 | 0.321 | 0.205 | 2 | hsa-let-7e-5p/hsa-let-7f-5p | hsa-miR-132-3p  |                |  |  |
| 259 | ZNF644     | 0.067 | 0.321 | 0.227 | 2 | hsa-let-7e-5p/hsa-let-7f-5p | hsa-miR-132-3p  |                |  |  |
| 260 | ZNF710     | 0.055 | 0.321 | 0.205 | 2 | hsa-let-7e-5p/hsa-let-7f-5p | hsa-miR-1306-5p |                |  |  |
| 261 | AC068987.1 | 0.079 | 0.325 | 0.250 | 2 | hsa-let-7e-5p/hsa-let-7f-5p | hsa-miR-1306-5p |                |  |  |
| 262 | ARL5B      | 0.073 | 0.325 | 0.239 | 2 | hsa-let-7e-5p/hsa-let-7f-5p | hsa-miR-29a-3p  |                |  |  |
| 263 | ATP2B4     | 0.073 | 0.325 | 0.239 | 2 | hsa-let-7e-5p/hsa-let-7f-5p | hsa-miR-29a-3p  |                |  |  |
| 264 | CAMKK2     | 0.073 | 0.325 | 0.239 | 2 | hsa-miR-29a-3p              | hsa-miR-378f    |                |  |  |
| 265 | CCDC71L    | 0.079 | 0.325 | 0.250 | 2 | hsa-let-7e-5p/hsa-let-7f-5p | hsa-miR-132-3p  |                |  |  |
| 266 | CFL2       | 0.075 | 0.325 | 0.371 | 3 | hsa-let-7e-5p/hsa-let-7f-5p | hsa-miR-132-3p  | hsa-miR-29a-3p |  |  |
| 267 | CNIH1      | 0.073 | 0.325 | 0.239 | 2 | hsa-miR-132-3p              | hsa-miR-29a-3p  |                |  |  |
| 268 | CREB5      | 0.073 | 0.325 | 0.239 | 2 | hsa-miR-132-3p              | hsa-miR-29a-3p  |                |  |  |
| 269 | DAAM1      | 0.079 | 0.325 | 0.250 | 2 | hsa-miR-132-3p              | hsa-miR-29a-3p  |                |  |  |
| 270 | FBXO42     | 0.073 | 0.325 | 0.239 | 2 | hsa-miR-132-3p              | hsa-miR-29a-3p  |                |  |  |
| 271 | FOXO3      | 0.073 | 0.325 | 0.239 | 2 | hsa-miR-132-3p              | hsa-miR-29a-3p  |                |  |  |

|     |          |       |       |       |   |                             |                 |  |  |  |
|-----|----------|-------|-------|-------|---|-----------------------------|-----------------|--|--|--|
| 272 | GABPB2   | 0.086 | 0.325 | 0.261 | 2 | hsa-miR-132-3p              | hsa-miR-29a-3p  |  |  |  |
| 273 | GHR      | 0.073 | 0.325 | 0.239 | 2 | hsa-let-7e-5p/hsa-let-7f-5p | hsa-miR-132-3p  |  |  |  |
| 274 | HMGA2    | 0.073 | 0.325 | 0.239 | 2 | hsa-let-7e-5p/hsa-let-7f-5p | hsa-miR-132-3p  |  |  |  |
| 275 | HMGCS1   | 0.073 | 0.325 | 0.239 | 2 | hsa-miR-1306-5p             | hsa-miR-29a-3p  |  |  |  |
| 276 | JOSD1    | 0.079 | 0.325 | 0.250 | 2 | hsa-let-7e-5p/hsa-let-7f-5p | hsa-miR-29a-3p  |  |  |  |
| 277 | KCNC2    | 0.073 | 0.325 | 0.239 | 2 | hsa-let-7e-5p/hsa-let-7f-5p | hsa-miR-29a-3p  |  |  |  |
| 278 | KDM5B    | 0.073 | 0.325 | 0.239 | 2 | hsa-miR-132-3p              | hsa-miR-29a-3p  |  |  |  |
| 279 | MAPK8    | 0.079 | 0.325 | 0.250 | 2 | hsa-let-7e-5p/hsa-let-7f-5p | hsa-miR-29a-3p  |  |  |  |
| 280 | MBD2     | 0.086 | 0.325 | 0.261 | 2 | hsa-let-7e-5p/hsa-let-7f-5p | hsa-miR-1306-5p |  |  |  |
| 281 | MBTD1    | 0.086 | 0.325 | 0.261 | 2 | hsa-let-7e-5p/hsa-let-7f-5p | hsa-miR-29a-3p  |  |  |  |
| 282 | MIB1     | 0.073 | 0.325 | 0.239 | 2 | hsa-let-7e-5p/hsa-let-7f-5p | hsa-miR-29a-3p  |  |  |  |
| 283 | MLXIP    | 0.073 | 0.325 | 0.239 | 2 | hsa-let-7e-5p/hsa-let-7f-5p | hsa-miR-29a-3p  |  |  |  |
| 284 | NKAP     | 0.086 | 0.325 | 0.261 | 2 | hsa-let-7e-5p/hsa-let-7f-5p | hsa-miR-1306-5p |  |  |  |
| 285 | NRAS     | 0.079 | 0.325 | 0.250 | 2 | hsa-let-7e-5p/hsa-let-7f-5p | hsa-miR-29a-3p  |  |  |  |
| 286 | ONECUT1  | 0.073 | 0.325 | 0.239 | 2 | hsa-let-7e-5p/hsa-let-7f-5p | hsa-miR-29a-3p  |  |  |  |
| 287 | OTUD3    | 0.086 | 0.325 | 0.261 | 2 | hsa-let-7e-5p/hsa-let-7f-5p | hsa-miR-132-3p  |  |  |  |
| 288 | PHACTR2  | 0.086 | 0.325 | 0.261 | 2 | hsa-let-7e-5p/hsa-let-7f-5p | hsa-miR-29a-3p  |  |  |  |
| 289 | PITPNA   | 0.086 | 0.325 | 0.261 | 2 | hsa-miR-29a-3p              | hsa-miR-378f    |  |  |  |
| 290 | RDX      | 0.079 | 0.325 | 0.250 | 2 | hsa-let-7e-5p/hsa-let-7f-5p | hsa-miR-132-3p  |  |  |  |
| 291 | REST     | 0.073 | 0.325 | 0.239 | 2 | hsa-miR-29a-3p              | hsa-miR-378f    |  |  |  |
| 292 | SLC16A10 | 0.086 | 0.325 | 0.261 | 2 | hsa-let-7e-5p/hsa-let-7f-5p | hsa-miR-29a-3p  |  |  |  |



|     |          |       |       |       |   |                             |                 |  |  |  |
|-----|----------|-------|-------|-------|---|-----------------------------|-----------------|--|--|--|
| 293 | SLC6A1   | 0.073 | 0.325 | 0.239 | 2 | hsa-let-7e-5p/hsa-let-7f-5p | hsa-miR-132-3p  |  |  |  |
| 294 | SMC1A    | 0.079 | 0.325 | 0.250 | 2 | hsa-let-7e-5p/hsa-let-7f-5p | hsa-miR-1306-5p |  |  |  |
| 295 | SNIP1    | 0.073 | 0.325 | 0.239 | 2 | hsa-miR-132-3p              | hsa-miR-29a-3p  |  |  |  |
| 296 | STX16    | 0.079 | 0.325 | 0.250 | 2 | hsa-miR-132-3p              | hsa-miR-29a-3p  |  |  |  |
| 297 | TFCP2L1  | 0.073 | 0.325 | 0.239 | 2 | hsa-miR-1306-5p             | hsa-miR-378f    |  |  |  |
| 298 | UBFD1    | 0.073 | 0.325 | 0.239 | 2 | hsa-miR-1306-5p             | hsa-miR-29a-3p  |  |  |  |
| 299 | VANGL1   | 0.086 | 0.325 | 0.261 | 2 | hsa-miR-29a-3p              | hsa-miR-378f    |  |  |  |
| 300 | VASH2    | 0.086 | 0.325 | 0.261 | 2 | hsa-let-7e-5p/hsa-let-7f-5p | hsa-miR-29a-3p  |  |  |  |
| 301 | XKR7     | 0.079 | 0.325 | 0.250 | 2 | hsa-let-7e-5p/hsa-let-7f-5p | hsa-miR-29a-3p  |  |  |  |
| 302 | XRN1     | 0.079 | 0.325 | 0.250 | 2 | hsa-let-7e-5p/hsa-let-7f-5p | hsa-miR-29a-3p  |  |  |  |
| 303 | ZFYVE26  | 0.073 | 0.325 | 0.239 | 2 | hsa-let-7e-5p/hsa-let-7f-5p | hsa-miR-29a-3p  |  |  |  |
| 304 | ATAD2B   | 0.108 | 0.336 | 0.295 | 2 | hsa-let-7e-5p/hsa-let-7f-5p | hsa-miR-29a-3p  |  |  |  |
| 305 | BAHD1    | 0.100 | 0.336 | 0.284 | 2 | hsa-let-7e-5p/hsa-let-7f-5p | hsa-miR-29a-3p  |  |  |  |
| 306 | BCL9L    | 0.093 | 0.336 | 0.273 | 2 | hsa-miR-1306-5p             | hsa-miR-29a-3p  |  |  |  |
| 307 | C11orf87 | 0.093 | 0.336 | 0.273 | 2 | hsa-miR-132-3p              | hsa-miR-29a-3p  |  |  |  |
| 308 | CAMSAP2  | 0.100 | 0.336 | 0.284 | 2 | hsa-miR-132-3p              | hsa-miR-29a-3p  |  |  |  |
| 309 | CBX6     | 0.093 | 0.336 | 0.273 | 2 | hsa-miR-1306-5p             | hsa-miR-29a-3p  |  |  |  |
| 310 | DCAF12   | 0.108 | 0.336 | 0.295 | 2 | hsa-miR-29a-3p              | hsa-miR-378f    |  |  |  |
| 311 | DIAPH2   | 0.100 | 0.336 | 0.284 | 2 | hsa-let-7e-5p/hsa-let-7f-5p | hsa-miR-29a-3p  |  |  |  |
| 312 | DICER1   | 0.100 | 0.336 | 0.284 | 2 | hsa-let-7e-5p/hsa-let-7f-5p | hsa-miR-29a-3p  |  |  |  |
| 313 | FBXW7    | 0.108 | 0.336 | 0.295 | 2 | hsa-miR-132-3p              | hsa-miR-29a-3p  |  |  |  |

|     |               |       |       |       |   |                             |                 |                |  |  |
|-----|---------------|-------|-------|-------|---|-----------------------------|-----------------|----------------|--|--|
| 314 | FMNL3         | 0.093 | 0.336 | 0.273 | 2 | hsa-miR-1306-5p             | hsa-miR-29a-3p  |                |  |  |
| 315 | FOXN3         | 0.100 | 0.336 | 0.284 | 2 | hsa-miR-132-3p              | hsa-miR-29a-3p  |                |  |  |
| 316 | IGF1R         | 0.108 | 0.336 | 0.295 | 2 | hsa-let-7e-5p/hsa-let-7f-5p | hsa-miR-378f    |                |  |  |
| 317 | LIN28B        | 0.100 | 0.336 | 0.284 | 2 | hsa-let-7e-5p/hsa-let-7f-5p | hsa-miR-132-3p  |                |  |  |
| 318 | MAP3K9        | 0.100 | 0.336 | 0.284 | 2 | hsa-let-7e-5p/hsa-let-7f-5p | hsa-miR-132-3p  |                |  |  |
| 319 | PDIK1L        | 0.093 | 0.336 | 0.273 | 2 | hsa-miR-29a-3p              | hsa-miR-378f    |                |  |  |
| 320 | PGM2L1        | 0.100 | 0.336 | 0.284 | 2 | hsa-let-7e-5p/hsa-let-7f-5p | hsa-miR-1306-5p |                |  |  |
| 321 | RGS7BP        | 0.108 | 0.336 | 0.295 | 2 | hsa-miR-1306-5p             | hsa-miR-132-3p  |                |  |  |
| 322 | RNF165        | 0.100 | 0.336 | 0.284 | 2 | hsa-let-7e-5p/hsa-let-7f-5p | hsa-miR-29a-3p  |                |  |  |
| 323 | RP11-766F14.2 | 0.108 | 0.336 | 0.295 | 2 | hsa-let-7e-5p/hsa-let-7f-5p | hsa-miR-29a-3p  |                |  |  |
| 324 | SIRT1         | 0.093 | 0.336 | 0.273 | 2 | hsa-miR-132-3p              | hsa-miR-29a-3p  |                |  |  |
| 325 | SP8           | 0.100 | 0.336 | 0.284 | 2 | hsa-let-7e-5p/hsa-let-7f-5p | hsa-miR-1306-5p |                |  |  |
| 326 | SRGAP2        | 0.100 | 0.336 | 0.284 | 2 | hsa-miR-132-3p              | hsa-miR-29a-3p  |                |  |  |
| 327 | SRSF10        | 0.096 | 0.336 | 0.409 | 3 | hsa-miR-132-3p              | hsa-miR-29a-3p  | hsa-miR-378f   |  |  |
| 328 | UCK2          | 0.093 | 0.336 | 0.273 | 2 | hsa-miR-29a-3p              | hsa-miR-378f    |                |  |  |
| 329 | WASF2         | 0.108 | 0.336 | 0.295 | 2 | hsa-miR-1306-5p             | hsa-miR-29a-3p  |                |  |  |
| 330 | YPEL2         | 0.100 | 0.336 | 0.284 | 2 | hsa-let-7e-5p/hsa-let-7f-5p | hsa-miR-29a-3p  |                |  |  |
| 331 | ZBTB37        | 0.108 | 0.336 | 0.295 | 2 | hsa-let-7e-5p/hsa-let-7f-5p | hsa-miR-29a-3p  |                |  |  |
| 332 | PDE7A         | 0.111 | 0.339 | 0.432 | 3 | hsa-miR-1306-5p             | hsa-miR-132-3p  | hsa-miR-29a-3p |  |  |
| 333 | C1orf21       | 0.115 | 0.347 | 0.307 | 2 | hsa-miR-29a-3p              | hsa-miR-378f    |                |  |  |
| 334 | CALN1         | 0.123 | 0.347 | 0.318 | 2 | hsa-let-7e-5p/hsa-let-7f-5p | hsa-miR-378f    |                |  |  |

|     |          |       |       |       |   |                             |                 |                |  |  |
|-----|----------|-------|-------|-------|---|-----------------------------|-----------------|----------------|--|--|
| 335 | CAMK1D   | 0.123 | 0.347 | 0.318 | 2 | hsa-miR-29a-3p              | hsa-miR-378f    |                |  |  |
| 336 | CCDC88A  | 0.130 | 0.347 | 0.330 | 2 | hsa-miR-132-3p              | hsa-miR-29a-3p  |                |  |  |
| 337 | CEP85L   | 0.123 | 0.347 | 0.318 | 2 | hsa-let-7e-5p/hsa-let-7f-5p | hsa-miR-29a-3p  |                |  |  |
| 338 | CYB561D1 | 0.123 | 0.347 | 0.318 | 2 | hsa-let-7e-5p/hsa-let-7f-5p | hsa-miR-29a-3p  |                |  |  |
| 339 | DNAL1    | 0.123 | 0.347 | 0.318 | 2 | hsa-let-7e-5p/hsa-let-7f-5p | hsa-miR-29a-3p  |                |  |  |
| 340 | FRMPD4   | 0.115 | 0.347 | 0.307 | 2 | hsa-miR-132-3p              | hsa-miR-378f    |                |  |  |
| 341 | GPCPD1   | 0.130 | 0.347 | 0.330 | 2 | hsa-let-7e-5p/hsa-let-7f-5p | hsa-miR-29a-3p  |                |  |  |
| 342 | GRAMD1B  | 0.123 | 0.347 | 0.318 | 2 | hsa-let-7e-5p/hsa-let-7f-5p | hsa-miR-29a-3p  |                |  |  |
| 343 | GRSF1    | 0.115 | 0.347 | 0.307 | 2 | hsa-miR-132-3p              | hsa-miR-378f    |                |  |  |
| 344 | KCNC3    | 0.123 | 0.347 | 0.318 | 2 | hsa-let-7e-5p/hsa-let-7f-5p | hsa-miR-29a-3p  |                |  |  |
| 345 | LPGAT1   | 0.115 | 0.347 | 0.307 | 2 | hsa-let-7e-5p/hsa-let-7f-5p | hsa-miR-29a-3p  |                |  |  |
| 346 | MAFG     | 0.115 | 0.347 | 0.307 | 2 | hsa-miR-1306-5p             | hsa-miR-29a-3p  |                |  |  |
| 347 | MAP3K3   | 0.130 | 0.347 | 0.330 | 2 | hsa-let-7e-5p/hsa-let-7f-5p | hsa-miR-132-3p  |                |  |  |
| 348 | MAPK6    | 0.130 | 0.347 | 0.330 | 2 | hsa-let-7e-5p/hsa-let-7f-5p | hsa-miR-1306-5p |                |  |  |
| 349 | MGA      | 0.123 | 0.347 | 0.318 | 2 | hsa-let-7e-5p/hsa-let-7f-5p | hsa-miR-29a-3p  |                |  |  |
| 350 | PRPF40A  | 0.115 | 0.347 | 0.307 | 2 | hsa-miR-1306-5p             | hsa-miR-29a-3p  |                |  |  |
| 351 | RALGPS1  | 0.123 | 0.347 | 0.318 | 2 | hsa-let-7e-5p/hsa-let-7f-5p | hsa-miR-29a-3p  |                |  |  |
| 352 | ROBO1    | 0.115 | 0.347 | 0.307 | 2 | hsa-let-7e-5p/hsa-let-7f-5p | hsa-miR-29a-3p  |                |  |  |
| 353 | SYT2     | 0.130 | 0.347 | 0.330 | 2 | hsa-let-7e-5p/hsa-let-7f-5p | hsa-miR-29a-3p  |                |  |  |
| 354 | TET3     | 0.121 | 0.347 | 0.447 | 3 | hsa-let-7e-5p/hsa-let-7f-5p | hsa-miR-1306-5p | hsa-miR-29a-3p |  |  |
| 355 | THBS1    | 0.123 | 0.347 | 0.318 | 2 | hsa-let-7e-5p/hsa-let-7f-5p | hsa-miR-132-3p  |                |  |  |

|     |          |       |       |       |   |                             |                 |                |  |  |
|-----|----------|-------|-------|-------|---|-----------------------------|-----------------|----------------|--|--|
| 356 | TMEM65   | 0.115 | 0.347 | 0.307 | 2 | hsa-let-7e-5p/hsa-let-7f-5p | hsa-miR-29a-3p  |                |  |  |
| 357 | ACVR2A   | 0.146 | 0.354 | 0.352 | 2 | hsa-let-7e-5p/hsa-let-7f-5p | hsa-miR-29a-3p  |                |  |  |
| 358 | ARMC8    | 0.146 | 0.354 | 0.352 | 2 | hsa-let-7e-5p/hsa-let-7f-5p | hsa-miR-29a-3p  |                |  |  |
| 359 | ARPP19   | 0.146 | 0.354 | 0.352 | 2 | hsa-let-7e-5p/hsa-let-7f-5p | hsa-miR-29a-3p  |                |  |  |
| 360 | BTBD7    | 0.146 | 0.354 | 0.352 | 2 | hsa-miR-132-3p              | hsa-miR-29a-3p  |                |  |  |
| 361 | C16orf72 | 0.146 | 0.354 | 0.352 | 2 | hsa-miR-29a-3p              | hsa-miR-378f    |                |  |  |
| 362 | CNOT6L   | 0.138 | 0.354 | 0.341 | 2 | hsa-let-7e-5p/hsa-let-7f-5p | hsa-miR-1306-5p |                |  |  |
| 363 | CTDSPL2  | 0.143 | 0.354 | 0.477 | 3 | hsa-let-7e-5p/hsa-let-7f-5p | hsa-miR-132-3p  | hsa-miR-29a-3p |  |  |
| 364 | DYNC1LI2 | 0.146 | 0.354 | 0.352 | 2 | hsa-miR-132-3p              | hsa-miR-378f    |                |  |  |
| 365 | GABBR2   | 0.138 | 0.354 | 0.341 | 2 | hsa-let-7e-5p/hsa-let-7f-5p | hsa-miR-1306-5p |                |  |  |
| 366 | HAPLN1   | 0.138 | 0.354 | 0.341 | 2 | hsa-miR-132-3p              | hsa-miR-29a-3p  |                |  |  |
| 367 | HCFC2    | 0.138 | 0.354 | 0.341 | 2 | hsa-let-7e-5p/hsa-let-7f-5p | hsa-miR-1306-5p |                |  |  |
| 368 | MAP2K6   | 0.146 | 0.354 | 0.352 | 2 | hsa-miR-29a-3p              | hsa-miR-378f    |                |  |  |
| 369 | RAB30    | 0.138 | 0.354 | 0.341 | 2 | hsa-let-7e-5p/hsa-let-7f-5p | hsa-miR-29a-3p  |                |  |  |
| 370 | RNF152   | 0.146 | 0.354 | 0.352 | 2 | hsa-let-7e-5p/hsa-let-7f-5p | hsa-miR-29a-3p  |                |  |  |
| 371 | RNF217   | 0.138 | 0.354 | 0.341 | 2 | hsa-let-7e-5p/hsa-let-7f-5p | hsa-miR-29a-3p  |                |  |  |
| 372 | RUNX1T1  | 0.137 | 0.354 | 0.470 | 3 | hsa-let-7e-5p/hsa-let-7f-5p | hsa-miR-132-3p  | hsa-miR-29a-3p |  |  |
| 373 | SRGAP1   | 0.138 | 0.354 | 0.341 | 2 | hsa-let-7e-5p/hsa-let-7f-5p | hsa-miR-132-3p  |                |  |  |
| 374 | ETNK1    | 0.155 | 0.360 | 0.364 | 2 | hsa-let-7e-5p/hsa-let-7f-5p | hsa-miR-132-3p  |                |  |  |
| 375 | FNDC3B   | 0.155 | 0.360 | 0.364 | 2 | hsa-let-7e-5p/hsa-let-7f-5p | hsa-miR-1306-5p |                |  |  |
| 376 | GAB1     | 0.155 | 0.360 | 0.364 | 2 | hsa-miR-132-3p              | hsa-miR-29a-3p  |                |  |  |

|     |           |       |       |       |   |                             |                |  |  |  |
|-----|-----------|-------|-------|-------|---|-----------------------------|----------------|--|--|--|
| 377 | GSK3B     | 0.155 | 0.360 | 0.364 | 2 | hsa-miR-132-3p              | hsa-miR-29a-3p |  |  |  |
| 378 | HELZ      | 0.155 | 0.360 | 0.364 | 2 | hsa-let-7e-5p/hsa-let-7f-5p | hsa-miR-29a-3p |  |  |  |
| 379 | LNPEP     | 0.155 | 0.360 | 0.364 | 2 | hsa-miR-29a-3p              | hsa-miR-378f   |  |  |  |
| 380 | PALM2     | 0.155 | 0.360 | 0.364 | 2 | hsa-miR-132-3p              | hsa-miR-29a-3p |  |  |  |
| 381 | PAPOLG    | 0.155 | 0.360 | 0.364 | 2 | hsa-miR-29a-3p              | hsa-miR-378f   |  |  |  |
| 382 | PEG10     | 0.155 | 0.360 | 0.364 | 2 | hsa-let-7e-5p/hsa-let-7f-5p | hsa-miR-29a-3p |  |  |  |
| 383 | PRKAA2    | 0.155 | 0.360 | 0.364 | 2 | hsa-let-7e-5p/hsa-let-7f-5p | hsa-miR-132-3p |  |  |  |
| 384 | SRGAP3    | 0.155 | 0.360 | 0.364 | 2 | hsa-let-7e-5p/hsa-let-7f-5p | hsa-miR-132-3p |  |  |  |
| 385 | ZNF516    | 0.155 | 0.360 | 0.364 | 2 | hsa-let-7e-5p/hsa-let-7f-5p | hsa-miR-132-3p |  |  |  |
| 386 | ZNF609    | 0.155 | 0.360 | 0.364 | 2 | hsa-miR-1306-5p             | hsa-miR-29a-3p |  |  |  |
| 387 | BSN       | 0.163 | 0.367 | 0.375 | 2 | hsa-let-7e-5p/hsa-let-7f-5p | hsa-miR-132-3p |  |  |  |
| 388 | FAXC      | 0.163 | 0.367 | 0.375 | 2 | hsa-let-7e-5p/hsa-let-7f-5p | hsa-miR-29a-3p |  |  |  |
| 389 | HLF       | 0.163 | 0.367 | 0.375 | 2 | hsa-let-7e-5p/hsa-let-7f-5p | hsa-miR-29a-3p |  |  |  |
| 390 | HNRNPA1   | 0.163 | 0.367 | 0.375 | 2 | hsa-let-7e-5p/hsa-let-7f-5p | hsa-miR-378f   |  |  |  |
| 391 | KDM2A     | 0.163 | 0.367 | 0.375 | 2 | hsa-miR-1306-5p             | hsa-miR-29a-3p |  |  |  |
| 392 | MAPK1IP1L | 0.163 | 0.367 | 0.375 | 2 | hsa-let-7e-5p/hsa-let-7f-5p | hsa-miR-378f   |  |  |  |
| 393 | MXD1      | 0.163 | 0.367 | 0.375 | 2 | hsa-let-7e-5p/hsa-let-7f-5p | hsa-miR-29a-3p |  |  |  |
| 394 | NSD1      | 0.163 | 0.367 | 0.375 | 2 | hsa-let-7e-5p/hsa-let-7f-5p | hsa-miR-29a-3p |  |  |  |
| 395 | SOCS7     | 0.163 | 0.367 | 0.375 | 2 | hsa-let-7e-5p/hsa-let-7f-5p | hsa-miR-29a-3p |  |  |  |
| 396 | TACC1     | 0.163 | 0.367 | 0.375 | 2 | hsa-miR-132-3p              | hsa-miR-29a-3p |  |  |  |
| 397 | CCNJ      | 0.172 | 0.367 | 0.386 | 2 | hsa-let-7e-5p/hsa-let-7f-5p | hsa-miR-29a-3p |  |  |  |

|     |          |       |       |       |   |                             |                |  |  |  |
|-----|----------|-------|-------|-------|---|-----------------------------|----------------|--|--|--|
| 398 | CRK      | 0.172 | 0.367 | 0.386 | 2 | hsa-let-7e-5p/hsa-let-7f-5p | hsa-miR-132-3p |  |  |  |
| 399 | EPC1     | 0.172 | 0.367 | 0.386 | 2 | hsa-miR-132-3p              | hsa-miR-29a-3p |  |  |  |
| 400 | FZD5     | 0.172 | 0.367 | 0.386 | 2 | hsa-miR-29a-3p              | hsa-miR-378f   |  |  |  |
| 401 | PHF15    | 0.172 | 0.367 | 0.386 | 2 | hsa-miR-1306-5p             | hsa-miR-378f   |  |  |  |
| 402 | PLAGL2   | 0.172 | 0.367 | 0.386 | 2 | hsa-let-7e-5p/hsa-let-7f-5p | hsa-miR-378f   |  |  |  |
| 403 | TET2     | 0.172 | 0.367 | 0.386 | 2 | hsa-let-7e-5p/hsa-let-7f-5p | hsa-miR-29a-3p |  |  |  |
| 404 | TRAF3    | 0.172 | 0.367 | 0.386 | 2 | hsa-miR-29a-3p              | hsa-miR-378f   |  |  |  |
| 405 | AKIRIN1  | 0.180 | 0.374 | 0.398 | 2 | hsa-miR-1306-5p             | hsa-miR-132-3p |  |  |  |
| 406 | BBX      | 0.189 | 0.374 | 0.409 | 2 | hsa-let-7e-5p/hsa-let-7f-5p | hsa-miR-132-3p |  |  |  |
| 407 | BRWD1    | 0.180 | 0.374 | 0.398 | 2 | hsa-miR-132-3p              | hsa-miR-29a-3p |  |  |  |
| 408 | ELMSAN1  | 0.180 | 0.374 | 0.398 | 2 | hsa-miR-132-3p              | hsa-miR-29a-3p |  |  |  |
| 409 | INO80D   | 0.180 | 0.374 | 0.398 | 2 | hsa-let-7e-5p/hsa-let-7f-5p | hsa-miR-29a-3p |  |  |  |
| 410 | NFIC     | 0.189 | 0.374 | 0.409 | 2 | hsa-miR-1306-5p             | hsa-miR-29a-3p |  |  |  |
| 411 | NLK      | 0.189 | 0.374 | 0.409 | 2 | hsa-let-7e-5p/hsa-let-7f-5p | hsa-miR-132-3p |  |  |  |
| 412 | PPARGC1A | 0.189 | 0.374 | 0.409 | 2 | hsa-let-7e-5p/hsa-let-7f-5p | hsa-miR-29a-3p |  |  |  |
| 413 | THRA     | 0.189 | 0.374 | 0.409 | 2 | hsa-let-7e-5p/hsa-let-7f-5p | hsa-miR-29a-3p |  |  |  |
| 414 | APC      | 0.198 | 0.381 | 0.420 | 2 | hsa-miR-1306-5p             | hsa-miR-29a-3p |  |  |  |
| 415 | CLCN5    | 0.207 | 0.381 | 0.432 | 2 | hsa-let-7e-5p/hsa-let-7f-5p | hsa-miR-29a-3p |  |  |  |
| 416 | DYNLL2   | 0.198 | 0.381 | 0.420 | 2 | hsa-miR-1306-5p             | hsa-miR-132-3p |  |  |  |
| 417 | GABRB1   | 0.207 | 0.381 | 0.432 | 2 | hsa-let-7e-5p/hsa-let-7f-5p | hsa-miR-29a-3p |  |  |  |
| 418 | H3F3B    | 0.198 | 0.381 | 0.420 | 2 | hsa-miR-132-3p              | hsa-miR-378f   |  |  |  |

|     |           |       |       |       |   |                             |                 |  |  |  |
|-----|-----------|-------|-------|-------|---|-----------------------------|-----------------|--|--|--|
| 419 | KCNK10    | 0.198 | 0.381 | 0.420 | 2 | hsa-miR-1306-5p             | hsa-miR-29a-3p  |  |  |  |
| 420 | MED12L    | 0.198 | 0.381 | 0.420 | 2 | hsa-miR-29a-3p              | hsa-miR-378f    |  |  |  |
| 421 | MEF2D     | 0.198 | 0.381 | 0.420 | 2 | hsa-let-7e-5p/hsa-let-7f-5p | hsa-miR-378f    |  |  |  |
| 422 | MEIS2     | 0.198 | 0.381 | 0.420 | 2 | hsa-let-7e-5p/hsa-let-7f-5p | hsa-miR-132-3p  |  |  |  |
| 423 | MEX3A     | 0.198 | 0.381 | 0.420 | 2 | hsa-let-7e-5p/hsa-let-7f-5p | hsa-miR-132-3p  |  |  |  |
| 424 | RBFOX2    | 0.207 | 0.381 | 0.432 | 2 | hsa-let-7e-5p/hsa-let-7f-5p | hsa-miR-29a-3p  |  |  |  |
| 425 | SMAD2     | 0.198 | 0.381 | 0.420 | 2 | hsa-let-7e-5p/hsa-let-7f-5p | hsa-miR-132-3p  |  |  |  |
| 426 | ZNF24     | 0.198 | 0.381 | 0.420 | 2 | hsa-let-7e-5p/hsa-let-7f-5p | hsa-miR-29a-3p  |  |  |  |
| 427 | AKT3      | 0.216 | 0.390 | 0.443 | 2 | hsa-miR-132-3p              | hsa-miR-29a-3p  |  |  |  |
| 428 | BMPR1A    | 0.216 | 0.390 | 0.443 | 2 | hsa-let-7e-5p/hsa-let-7f-5p | hsa-miR-132-3p  |  |  |  |
| 429 | C20orf112 | 0.216 | 0.390 | 0.443 | 2 | hsa-let-7e-5p/hsa-let-7f-5p | hsa-miR-29a-3p  |  |  |  |
| 430 | GMFB      | 0.216 | 0.390 | 0.443 | 2 | hsa-miR-132-3p              | hsa-miR-29a-3p  |  |  |  |
| 431 | KIAA2022  | 0.216 | 0.390 | 0.443 | 2 | hsa-let-7e-5p/hsa-let-7f-5p | hsa-miR-29a-3p  |  |  |  |
| 432 | LARP4B    | 0.216 | 0.390 | 0.443 | 2 | hsa-miR-1306-5p             | hsa-miR-29a-3p  |  |  |  |
| 433 | RBMS1     | 0.216 | 0.390 | 0.443 | 2 | hsa-let-7e-5p/hsa-let-7f-5p | hsa-miR-378f    |  |  |  |
| 434 | RSF1      | 0.216 | 0.390 | 0.443 | 2 | hsa-let-7e-5p/hsa-let-7f-5p | hsa-miR-1306-5p |  |  |  |
| 435 | USP15     | 0.216 | 0.390 | 0.443 | 2 | hsa-miR-132-3p              | hsa-miR-29a-3p  |  |  |  |
| 436 | HIC2      | 0.225 | 0.392 | 0.455 | 2 | hsa-let-7e-5p/hsa-let-7f-5p | hsa-miR-132-3p  |  |  |  |
| 437 | PLEKHA3   | 0.225 | 0.392 | 0.455 | 2 | hsa-let-7e-5p/hsa-let-7f-5p | hsa-miR-29a-3p  |  |  |  |
| 438 | SESTD1    | 0.225 | 0.392 | 0.455 | 2 | hsa-let-7e-5p/hsa-let-7f-5p | hsa-miR-29a-3p  |  |  |  |
| 439 | AFF4      | 0.234 | 0.399 | 0.466 | 2 | hsa-miR-132-3p              | hsa-miR-29a-3p  |  |  |  |

|     |         |       |       |       |   |                             |                 |              |  |  |
|-----|---------|-------|-------|-------|---|-----------------------------|-----------------|--------------|--|--|
| 440 | ANKRD52 | 0.233 | 0.399 | 0.583 | 3 | hsa-let-7e-5p/hsa-let-7f-5p | hsa-miR-29a-3p  | hsa-miR-378f |  |  |
| 441 | BCL11B  | 0.234 | 0.399 | 0.466 | 2 | hsa-miR-1306-5p             | hsa-miR-29a-3p  |              |  |  |
| 442 | CHD7    | 0.234 | 0.399 | 0.466 | 2 | hsa-let-7e-5p/hsa-let-7f-5p | hsa-miR-1306-5p |              |  |  |
| 443 | FBXO28  | 0.234 | 0.399 | 0.466 | 2 | hsa-miR-132-3p              | hsa-miR-29a-3p  |              |  |  |
| 444 | FZD4    | 0.234 | 0.399 | 0.466 | 2 | hsa-let-7e-5p/hsa-let-7f-5p | hsa-miR-29a-3p  |              |  |  |
| 445 | G3BP1   | 0.234 | 0.399 | 0.466 | 2 | hsa-let-7e-5p/hsa-let-7f-5p | hsa-miR-29a-3p  |              |  |  |
| 446 | IGF2BP1 | 0.234 | 0.399 | 0.466 | 2 | hsa-let-7e-5p/hsa-let-7f-5p | hsa-miR-29a-3p  |              |  |  |
| 447 | RIMKLA  | 0.234 | 0.399 | 0.466 | 2 | hsa-let-7e-5p/hsa-let-7f-5p | hsa-miR-1306-5p |              |  |  |
| 448 | SAMD12  | 0.234 | 0.399 | 0.466 | 2 | hsa-let-7e-5p/hsa-let-7f-5p | hsa-miR-132-3p  |              |  |  |
| 449 | BRWD3   | 0.243 | 0.401 | 0.477 | 2 | hsa-let-7e-5p/hsa-let-7f-5p | hsa-miR-29a-3p  |              |  |  |
| 450 | CBL     | 0.243 | 0.401 | 0.477 | 2 | hsa-let-7e-5p/hsa-let-7f-5p | hsa-miR-378f    |              |  |  |
| 451 | CDK6    | 0.243 | 0.401 | 0.477 | 2 | hsa-let-7e-5p/hsa-let-7f-5p | hsa-miR-29a-3p  |              |  |  |
| 452 | CNNM2   | 0.243 | 0.401 | 0.477 | 2 | hsa-let-7e-5p/hsa-let-7f-5p | hsa-miR-29a-3p  |              |  |  |
| 453 | DYRK1A  | 0.243 | 0.401 | 0.477 | 2 | hsa-let-7e-5p/hsa-let-7f-5p | hsa-miR-378f    |              |  |  |
| 454 | GRIN2B  | 0.243 | 0.401 | 0.477 | 2 | hsa-let-7e-5p/hsa-let-7f-5p | hsa-miR-29a-3p  |              |  |  |
| 455 | KMT2D   | 0.243 | 0.401 | 0.477 | 2 | hsa-let-7e-5p/hsa-let-7f-5p | hsa-miR-1306-5p |              |  |  |
| 456 | CCND2   | 0.252 | 0.410 | 0.489 | 2 | hsa-let-7e-5p/hsa-let-7f-5p | hsa-miR-29a-3p  |              |  |  |
| 457 | KDM5A   | 0.252 | 0.410 | 0.489 | 2 | hsa-miR-132-3p              | hsa-miR-29a-3p  |              |  |  |
| 458 | PLXNC1  | 0.262 | 0.412 | 0.500 | 2 | hsa-let-7e-5p/hsa-let-7f-5p | hsa-miR-29a-3p  |              |  |  |
| 459 | SYNCRIP | 0.262 | 0.412 | 0.500 | 2 | hsa-let-7e-5p/hsa-let-7f-5p | hsa-miR-29a-3p  |              |  |  |
| 460 | ZBTB34  | 0.262 | 0.412 | 0.500 | 2 | hsa-miR-132-3p              | hsa-miR-29a-3p  |              |  |  |



|     |         |       |       |       |   |                             |                |  |  |  |
|-----|---------|-------|-------|-------|---|-----------------------------|----------------|--|--|--|
| 461 | ANKFY1  | 0.281 | 0.421 | 0.523 | 2 | hsa-let-7e-5p/hsa-let-7f-5p | hsa-miR-29a-3p |  |  |  |
| 462 | CPEB3   | 0.281 | 0.421 | 0.523 | 2 | hsa-let-7e-5p/hsa-let-7f-5p | hsa-miR-29a-3p |  |  |  |
| 463 | CCNT2   | 0.290 | 0.428 | 0.534 | 2 | hsa-let-7e-5p/hsa-let-7f-5p | hsa-miR-29a-3p |  |  |  |
| 464 | CLOCK   | 0.300 | 0.428 | 0.545 | 2 | hsa-let-7e-5p/hsa-let-7f-5p | hsa-miR-132-3p |  |  |  |
| 465 | FIGN    | 0.300 | 0.428 | 0.545 | 2 | hsa-let-7e-5p/hsa-let-7f-5p | hsa-miR-29a-3p |  |  |  |
| 466 | MAPK1   | 0.290 | 0.428 | 0.534 | 2 | hsa-miR-132-3p              | hsa-miR-378f   |  |  |  |
| 467 | ATXN1   | 0.319 | 0.438 | 0.568 | 2 | hsa-miR-132-3p              | hsa-miR-29a-3p |  |  |  |
| 468 | FRS2    | 0.319 | 0.438 | 0.568 | 2 | hsa-let-7e-5p/hsa-let-7f-5p | hsa-miR-29a-3p |  |  |  |
| 469 | MMP16   | 0.319 | 0.438 | 0.568 | 2 | hsa-miR-132-3p              | hsa-miR-29a-3p |  |  |  |
| 470 | DYRK2   | 0.329 | 0.444 | 0.580 | 2 | hsa-let-7e-5p/hsa-let-7f-5p | hsa-miR-132-3p |  |  |  |
| 471 | MAP3K2  | 0.329 | 0.444 | 0.580 | 2 | hsa-let-7e-5p/hsa-let-7f-5p | hsa-miR-29a-3p |  |  |  |
| 472 | RPS6KA3 | 0.329 | 0.444 | 0.580 | 2 | hsa-let-7e-5p/hsa-let-7f-5p | hsa-miR-29a-3p |  |  |  |
| 473 | SCN1A   | 0.329 | 0.444 | 0.580 | 2 | hsa-miR-1306-5p             | hsa-miR-132-3p |  |  |  |
| 474 | FOXP2   | 0.338 | 0.450 | 0.591 | 2 | hsa-let-7e-5p/hsa-let-7f-5p | hsa-miR-132-3p |  |  |  |
| 475 | NOVA1   | 0.338 | 0.450 | 0.591 | 2 | hsa-let-7e-5p/hsa-let-7f-5p | hsa-miR-132-3p |  |  |  |
| 476 | GTDC1   | 0.348 | 0.453 | 0.602 | 2 | hsa-miR-132-3p              | hsa-miR-29a-3p |  |  |  |
| 477 | TCF4    | 0.348 | 0.453 | 0.602 | 2 | hsa-miR-1306-5p             | hsa-miR-29a-3p |  |  |  |
| 478 | PTEN    | 0.358 | 0.463 | 0.614 | 2 | hsa-miR-132-3p              | hsa-miR-29a-3p |  |  |  |
| 479 | SESN3   | 0.358 | 0.463 | 0.614 | 2 | hsa-let-7e-5p/hsa-let-7f-5p | hsa-miR-132-3p |  |  |  |
| 480 | GAN     | 0.367 | 0.466 | 0.625 | 2 | hsa-let-7e-5p/hsa-let-7f-5p | hsa-miR-29a-3p |  |  |  |
| 481 | KPNA4   | 0.377 | 0.472 | 0.636 | 2 | hsa-let-7e-5p/hsa-let-7f-5p | hsa-miR-29a-3p |  |  |  |

|     |         |       |       |       |   |                             |                 |              |  |  |
|-----|---------|-------|-------|-------|---|-----------------------------|-----------------|--------------|--|--|
| 482 | NFAT5   | 0.387 | 0.478 | 0.648 | 2 | hsa-miR-132-3p              | hsa-miR-29a-3p  |              |  |  |
| 483 | HIPK2   | 0.396 | 0.481 | 0.659 | 2 | hsa-let-7e-5p/hsa-let-7f-5p | hsa-miR-1306-5p |              |  |  |
| 484 | KCMF1   | 0.396 | 0.481 | 0.659 | 2 | hsa-let-7e-5p/hsa-let-7f-5p | hsa-miR-132-3p  |              |  |  |
| 485 | STRN    | 0.396 | 0.481 | 0.659 | 2 | hsa-let-7e-5p/hsa-let-7f-5p | hsa-miR-29a-3p  |              |  |  |
| 486 | ABI2    | 0.406 | 0.491 | 0.670 | 2 | hsa-miR-1306-5p             | hsa-miR-378f    |              |  |  |
| 487 | ACVR2B  | 0.415 | 0.493 | 0.682 | 2 | hsa-let-7e-5p/hsa-let-7f-5p | hsa-miR-132-3p  |              |  |  |
| 488 | BNC2    | 0.415 | 0.493 | 0.682 | 2 | hsa-let-7e-5p/hsa-let-7f-5p | hsa-miR-132-3p  |              |  |  |
| 489 | ZBTB10  | 0.415 | 0.493 | 0.682 | 2 | hsa-let-7e-5p/hsa-let-7f-5p | hsa-miR-29a-3p  |              |  |  |
| 490 | ONECUT2 | 0.435 | 0.507 | 0.705 | 2 | hsa-let-7e-5p/hsa-let-7f-5p | hsa-miR-29a-3p  |              |  |  |
| 491 | QKI     | 0.435 | 0.507 | 0.705 | 2 | hsa-miR-132-3p              | hsa-miR-29a-3p  |              |  |  |
| 492 | UBN2    | 0.435 | 0.507 | 0.705 | 2 | hsa-let-7e-5p/hsa-let-7f-5p | hsa-miR-29a-3p  |              |  |  |
| 493 | CELF2   | 0.444 | 0.511 | 0.716 | 2 | hsa-miR-132-3p              | hsa-miR-29a-3p  |              |  |  |
| 494 | NFIA    | 0.444 | 0.511 | 0.716 | 2 | hsa-miR-132-3p              | hsa-miR-29a-3p  |              |  |  |
| 495 | AGO3    | 0.454 | 0.514 | 0.727 | 2 | hsa-let-7e-5p/hsa-let-7f-5p | hsa-miR-29a-3p  |              |  |  |
| 496 | ZBTB20  | 0.457 | 0.514 | 0.795 | 3 | hsa-miR-132-3p              | hsa-miR-29a-3p  | hsa-miR-378f |  |  |
| 497 | AAK1    | 0.482 | 0.533 | 0.761 | 2 | hsa-let-7e-5p/hsa-let-7f-5p | hsa-miR-378f    |              |  |  |
| 498 | NFIB    | 0.556 | 0.586 | 0.852 | 2 | hsa-miR-132-3p              | hsa-miR-29a-3p  |              |  |  |
| 499 | NUFIP2  | 0.556 | 0.586 | 0.852 | 2 | hsa-miR-29a-3p              | hsa-miR-378f    |              |  |  |

Abbreviation: FDR, false discovery rate.

**Table S6. KEGG analysis using 499 putative target transcripts.**

| Term name |                                                        | Term id    | Adjusted p value | Gene counts | Associated genes                                                                                                                                          |
|-----------|--------------------------------------------------------|------------|------------------|-------------|-----------------------------------------------------------------------------------------------------------------------------------------------------------|
| 1         | Hepatocellular carcinoma                               | KEGG:05225 | 1.54E-06         | 19          | PIK3CA,GSK3B,MAPK1,IGF1R,AKT3,PTEN,CDKN1A,NRAS,FZD5,APC,APC2,RB1,ARID1B,WNT9B,SMARCC1,GAB1,SMAD2,FZD4,CDK6                                                |
| 2         | Focal adhesion                                         | KEGG:04510 | 1.54E-06         | 21          | PIK3CA,GSK3B,MAPK1,MAPK8,CRK,COL4A2,PDGFB,COL4A1,COL4A6,IGF1,COL4A4,IGF1R,AKT3,PTEN,COL1A2,COL1A1,THBS1,CCND2,COL4A5,DIAPH1,COL9A1                        |
| 3         | FoxO signaling pathway                                 | KEGG:04068 | 4.17E-06         | 16          | PIK3CA,MAPK1,PRKAA2,FOXO3,MAPK8,PRKAB2,IGF1,IGF1R,AKT3,PTEN,CDKN1A,NRAS,CCND2,STAT3,SIRT1,NLK                                                             |
| 4         | EGFR tyrosine kinase inhibitor resistance              | KEGG:01521 | 1.00E-05         | 12          | PIK3CA,GSK3B,MAPK1,FOXO3,PDGFB,IGF1,IGF1R,AKT3,PTEN,NRAS,STAT3,GAB1                                                                                       |
| 5         | PI3K-Akt signaling pathway                             | KEGG:04151 | 2.80E-05         | 25          | PIK3CA,GSK3B,MAPK1,PRKAA2,FOXO3,COL4A2,PDGFB,COL4A1,COL4A6,IGF1,COL4A4,IGF1R,AKT3,PTEN,CDKN1A,COL1A2,COL1A1,THBS1,CREB5,GHR,NRAS,CCND2,COL4A5,COL9A1,CDK6 |
| 6         | ErbB signaling pathway                                 | KEGG:04012 | 7.73E-05         | 11          | PIK3CA,GSK3B,MAPK1,MAPK8,CRK,CBL,AKT3,CDKN1A,NRAS,HBEGF,GAB1                                                                                              |
| 7         | Prolactin signaling pathway                            | KEGG:04917 | 8.87E-05         | 10          | PIK3CA,GSK3B,MAPK1,FOXO3,MAPK8,AKT3,NRAS,CCND2,STAT3,SOCS7                                                                                                |
| 8         | Insulin resistance                                     | KEGG:04931 | 1.44E-04         | 12          | PIK3CA,GSK3B,PRKAA2,MAPK8,PRKAB2,RPS6KA3,AKT3,PTEN,PPARGC1A,CREB5,STAT3,MLXIP                                                                             |
| 9         | Endocrine resistance                                   | KEGG:01522 | 1.92E-04         | 11          | PIK3CA,MAPK1,MAPK8,IGF1,IGF1R,AKT3,CDKN1A,NRAS,HBEGF,RB1,NCOR1                                                                                            |
| 10        | mTOR signaling pathway                                 | KEGG:04150 | 2.35E-04         | 14          | PIK3CA,GSK3B,MAPK1,PRKAA2,RPS6KA3,IGF1,IGF1R,AKT3,PTEN,NRAS,FZD5,WNT9B,RNF152,FZD4                                                                        |
| 11        | Wnt signaling pathway                                  | KEGG:04310 | 4.78E-04         | 14          | GSK3B,MAPK8,CCND2,CHD8,FZD5,APC,APC2,PRICKLE2,WNT9B,PPP3CA,DAAM1,VANGL1,NLK,FZD4                                                                          |
| 12        | PD-L1 expression and PD-1 checkpoint pathway in cancer | KEGG:05235 | 4.78E-04         | 10          | PIK3CA,MAPK1,MAP3K3,MAP2K6,AKT3,PTEN,NRAS,RASGRP1,STAT3,PPP3CA                                                                                            |
| 13        | MAPK signaling pathway                                 | KEGG:04010 | 2.19E-03         | 18          | MAPK1,MAPK8,MAP4K4,MAP3K3,MAP2K6,MAP3K2,RPS6KA3,CRK,PDGFB,IGF1,IGF1R,AKT3,NRAS,DUSP9,CACNG4,RASGRP1,PPP3CA,NLK                                            |
| 14        | Hippo signaling pathway                                | KEGG:04390 | 2.89E-03         | 12          | GSK3B,CCND2,AMOT,MOB1B,FZD5,APC,APC2,WNT9B,BMP2,SMAD2,BMPRI1A,FZD4                                                                                        |
| 15        | Insulin signaling pathway                              | KEGG:04910 | 3.18E-03         | 11          | PIK3CA,GSK3B,MAPK1,PRKAA2,MAPK8,PRKAB2,CRK,CBL,AKT3,PPARGC1A,NRAS                                                                                         |
| 16        | Alcoholic liver disease                                | KEGG:04936 | 4.03E-03         | 11          | GSK3B,PRKAA2,FOXO3,MAPK8,PRKAB2,MAP2K6,AKT3,PPARGC1A,CAMKK2,SIRT1,TRAF3                                                                                   |
| 17        | Adipocytokine signaling pathway                        | KEGG:04920 | 7.11E-03         | 7           | PRKAA2,MAPK8,PRKAB2,AKT3,PPARGC1A,STAT3,CAMKK2                                                                                                            |
| 18        | TGF-beta signaling pathway                             | KEGG:04350 | 9.32E-03         | 8           | MAPK1,THBS1,E2F5,BMP2,ACVR2A,SMAD2,BMPRI1A,ACVR2B                                                                                                         |

|    |                       |            |          |   |                                         |
|----|-----------------------|------------|----------|---|-----------------------------------------|
| 19 | p53 signaling pathway | KEGG:04115 | 9.32E-03 | 7 | SESN3,IGF1,PTEN,CDKN1A,THBS1,CCND2,CDK6 |
|----|-----------------------|------------|----------|---|-----------------------------------------|

Figure S1. Summary of study design.

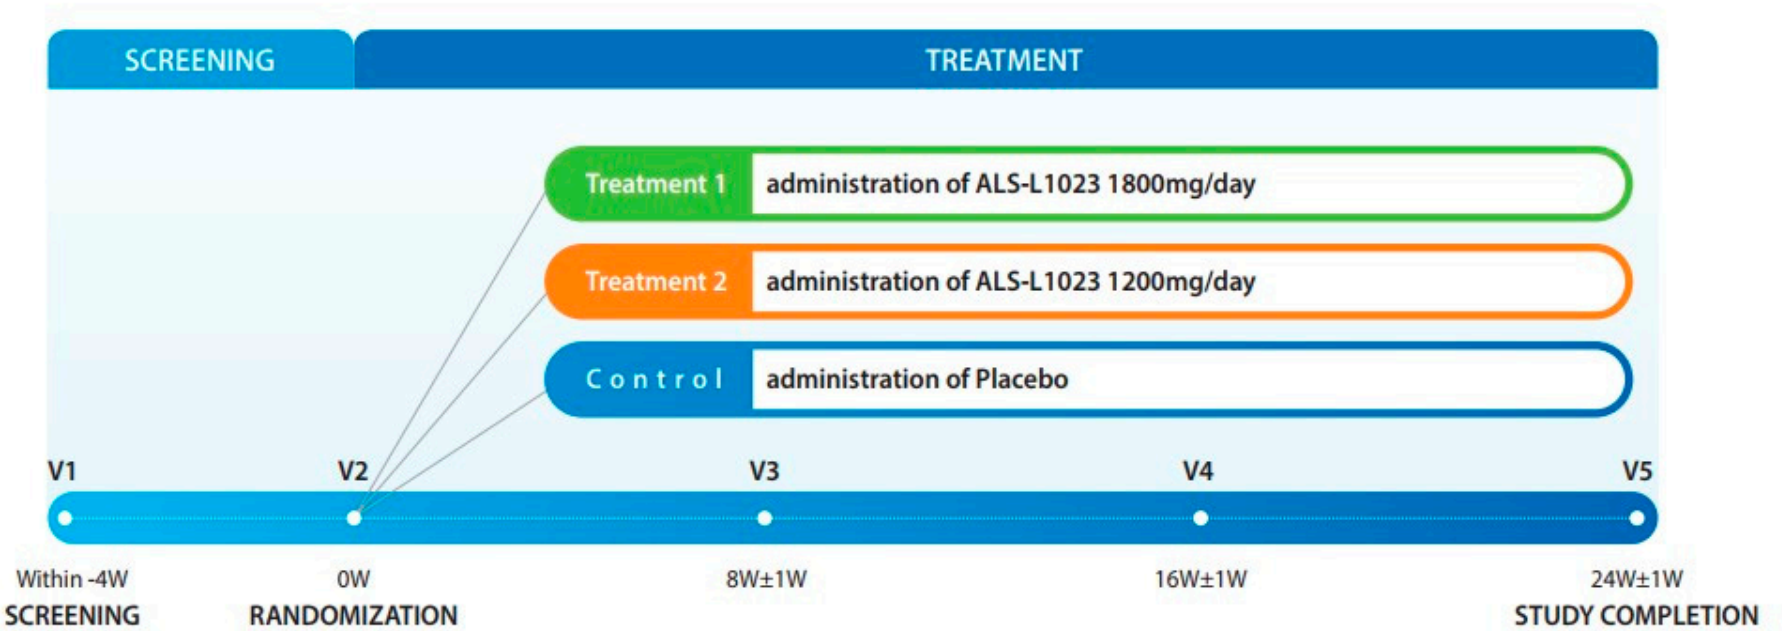

Figure S2. MRI-PDF change in the PPS

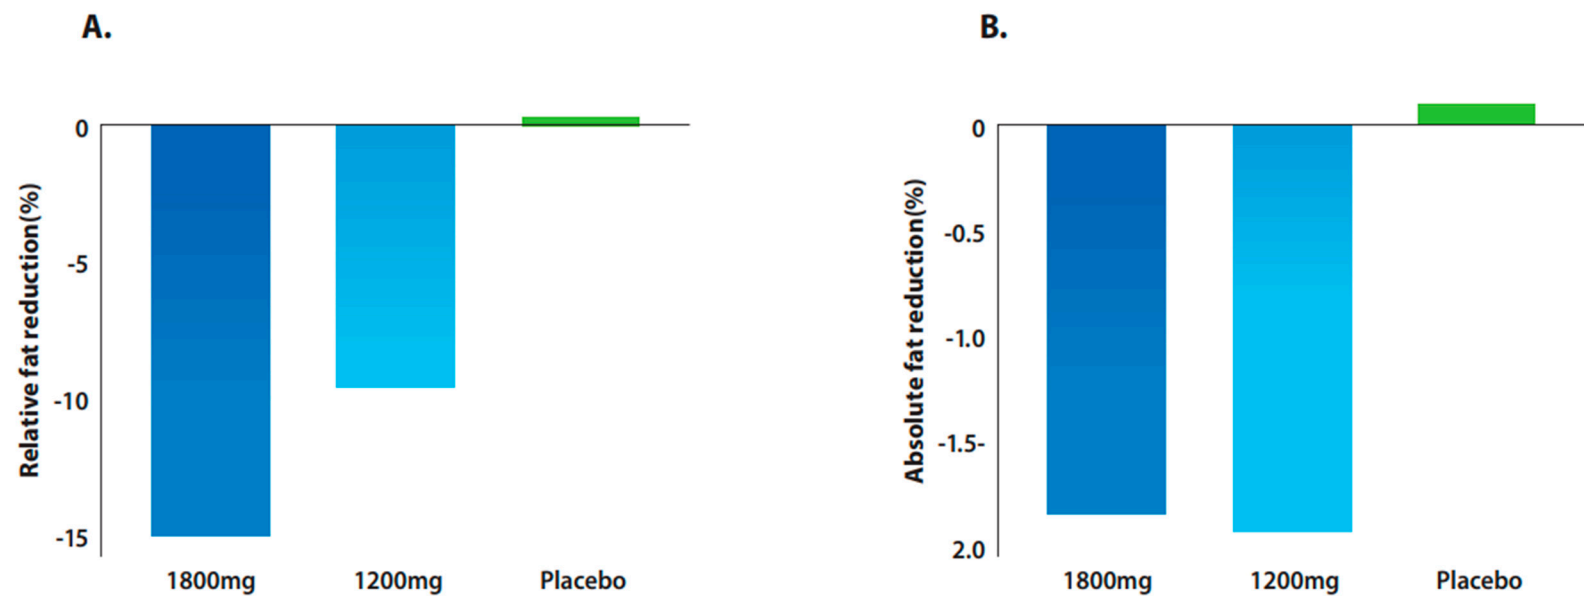

Figure S3. Change of liver biochemistry in the PPS

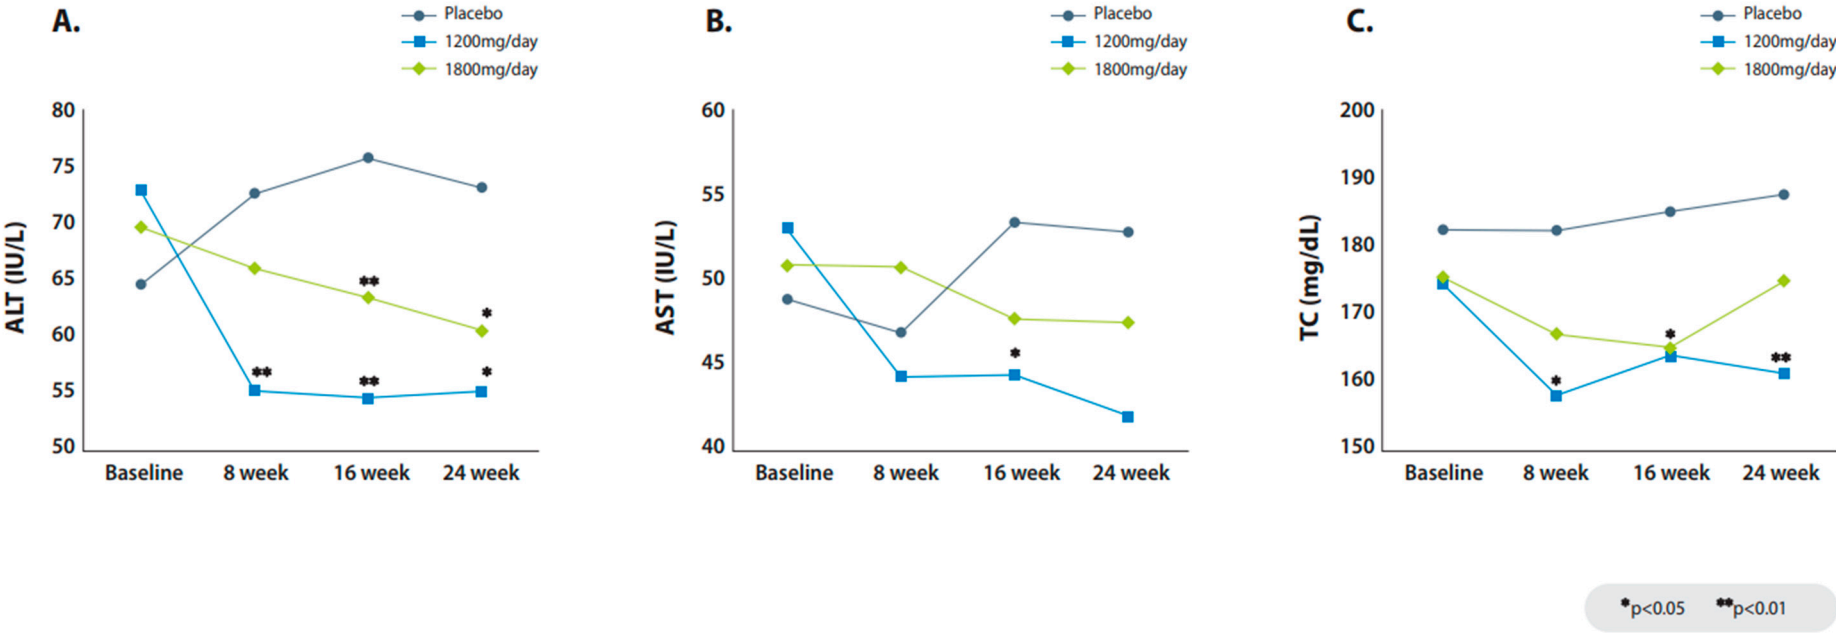

Supplement: s1 [file s1]
